# Supplementary material for: One-pot double functionalisation of π-deficient heterocyclic lithium reagents
Source: Royal Society of Chemistry journal article supplement (doi:10.1039/c0ob00734j), 2011-01-01

## Supporting information

### One-pot double functionalisation of $\pi$ -deficient heterocyclic lithium reagents.

*Anthony Chartoire, Corinne Comoy and Yves Fort\**

Groupe Synthèse Organométallique et Réactivité, SRSMC, Nancy Université, CNRS,  
B.P.239, Boulevard des aiguillettes, F-54506 Vandoeuvre-les-Nancy, France.

#### Table of contents

|                                                        |     |
|--------------------------------------------------------|-----|
| GC and NMR spectra of new compounds.....               | S2  |
| GC, $^1\text{H}$ and $^{13}\text{C}$ for 4a.....       | S2  |
| GC, $^1\text{H}$ and $^{13}\text{C}$ for 5a.....       | S4  |
| GC, $^1\text{H}$ and $^{13}\text{C}$ for 4b. ....      | S7  |
| GC, $^1\text{H}$ and $^{13}\text{C}$ for 5b. ....      | S9  |
| GC, $^1\text{H}$ and $^{13}\text{C}$ for 7b (+7a)..... | S11 |
| GC, $^1\text{H}$ and $^{13}\text{C}$ for 8. ....       | S14 |
| GC, $^1\text{H}$ and $^{13}\text{C}$ for 9b. ....      | S16 |
| GC, $^1\text{H}$ and $^{13}\text{C}$ for 10b. ....     | S19 |
| GC, $^1\text{H}$ and $^{13}\text{C}$ for 11a.....      | S22 |
| GC, $^1\text{H}$ and $^{13}\text{C}$ for 11b. ....     | S25 |
| GC, $^1\text{H}$ and $^{13}\text{C}$ for 12b. ....     | S28 |
| GC, $^1\text{H}$ and $^{13}\text{C}$ for 13b. ....     | S30 |
| GC, $^1\text{H}$ and $^{13}\text{C}$ for 14b. ....     | S32 |
| GC, $^1\text{H}$ and $^{13}\text{C}$ for 15b. ....     | S34 |

## GC and NMR spectra of new compounds

### GC, $^1\text{H}$ and $^{13}\text{C}$ for 4a.

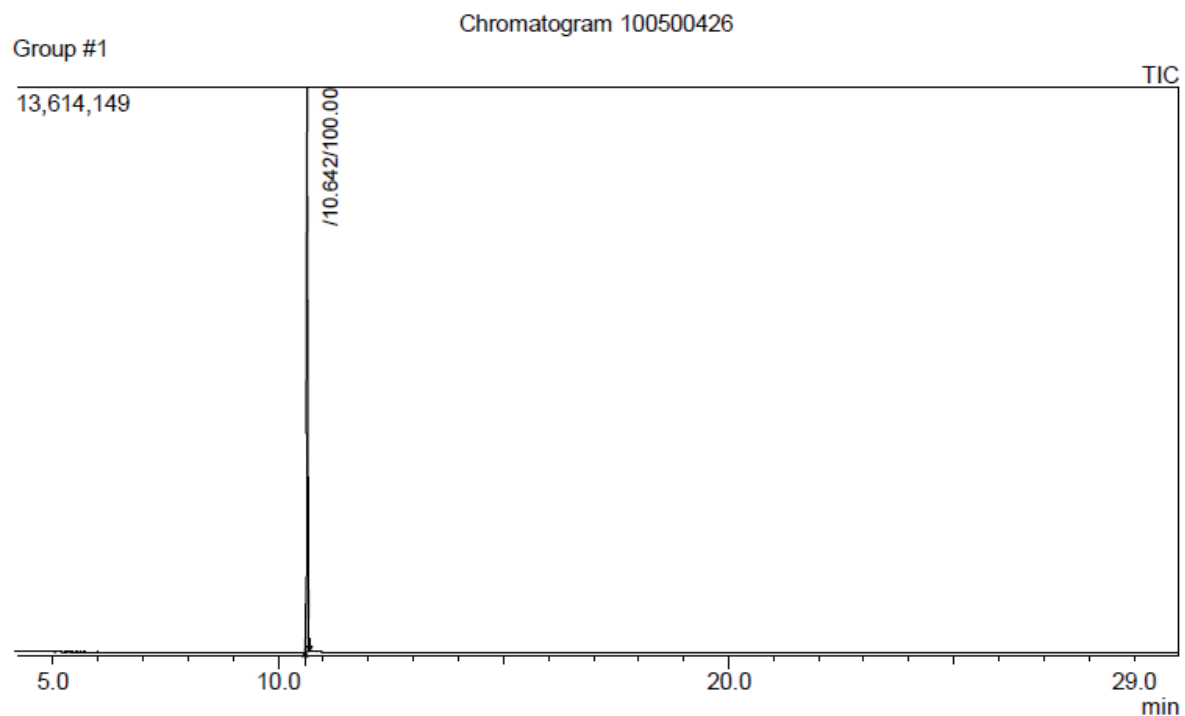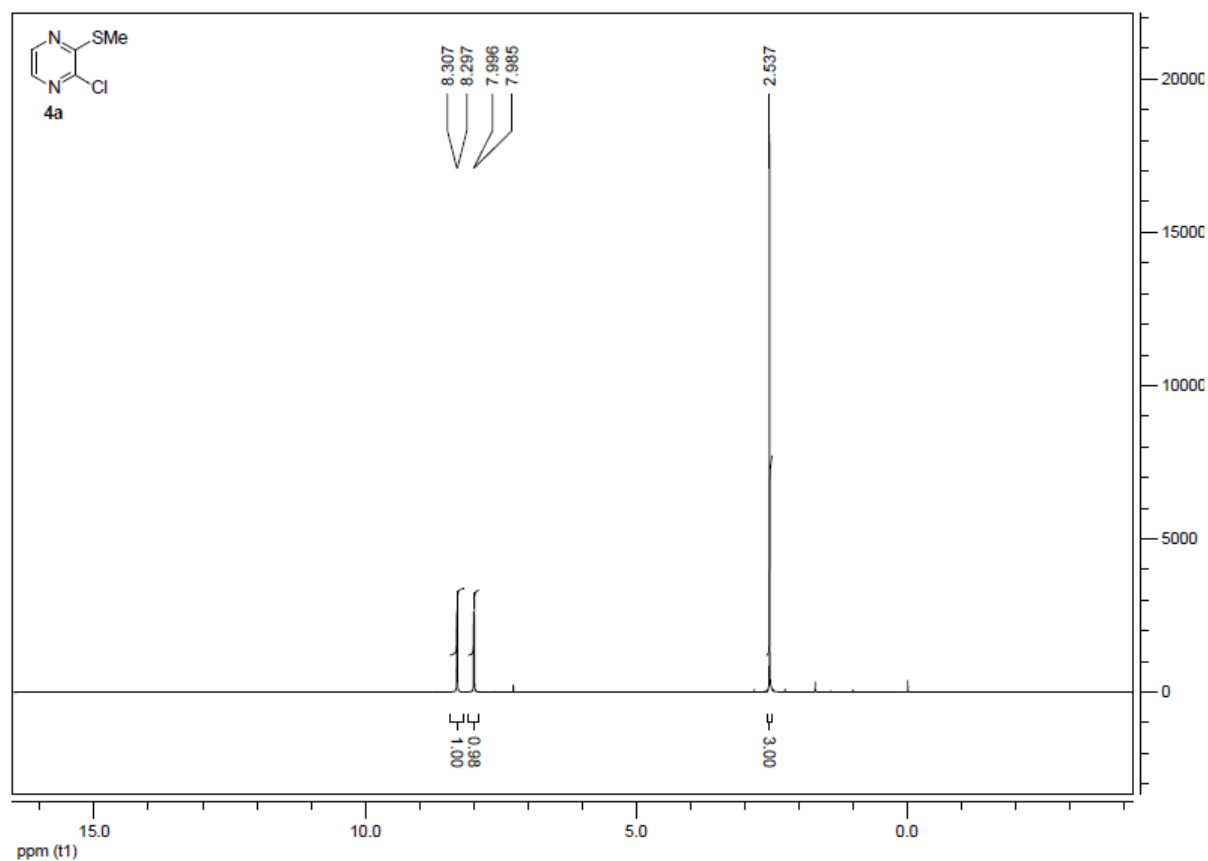

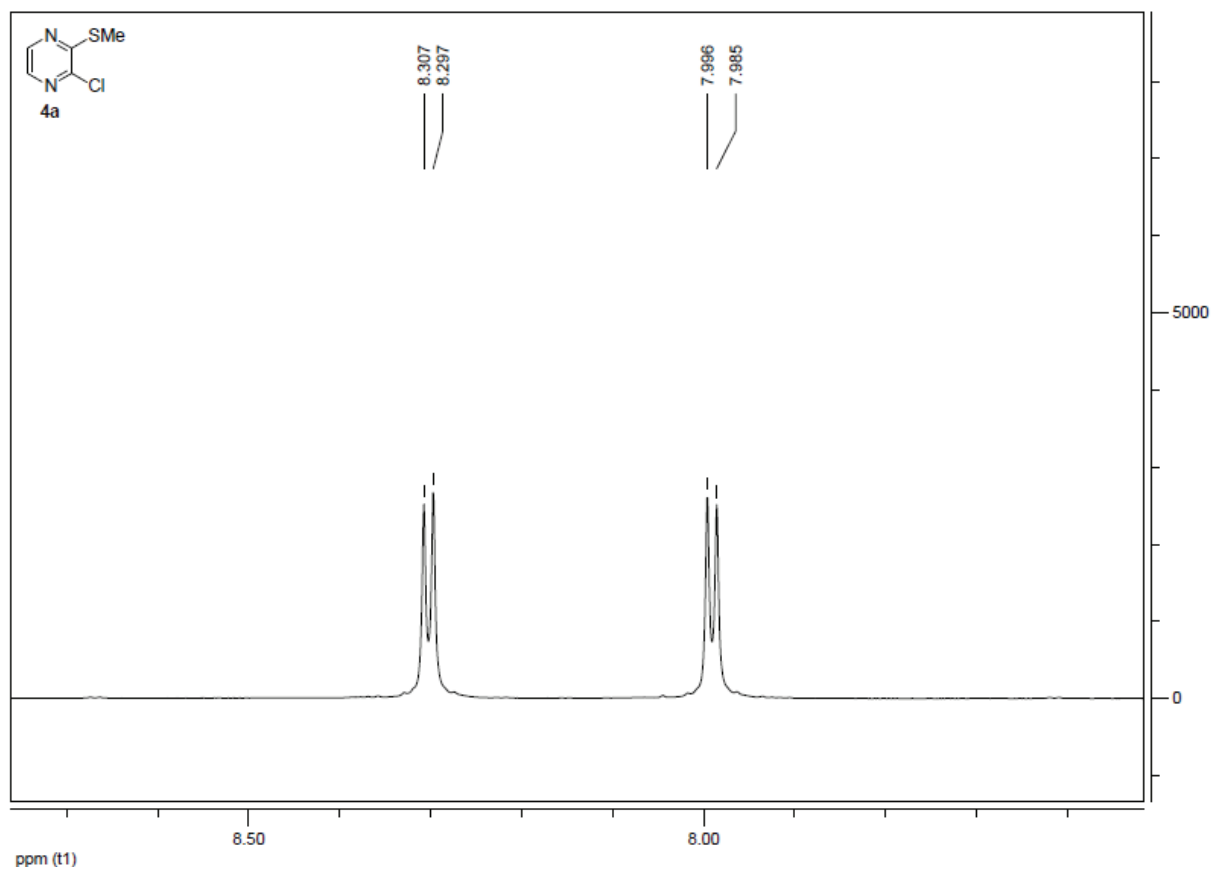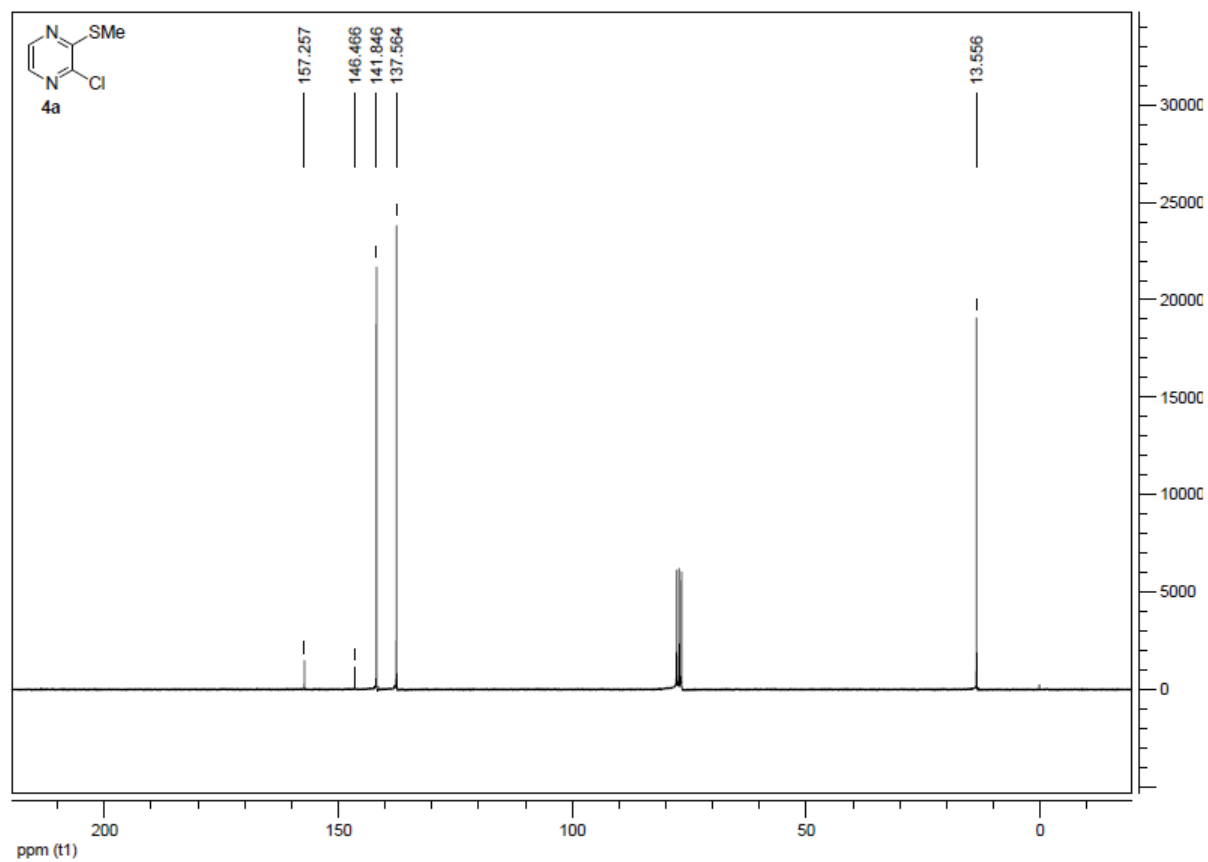

## GC, $^1\text{H}$ and $^{13}\text{C}$ for 5a.

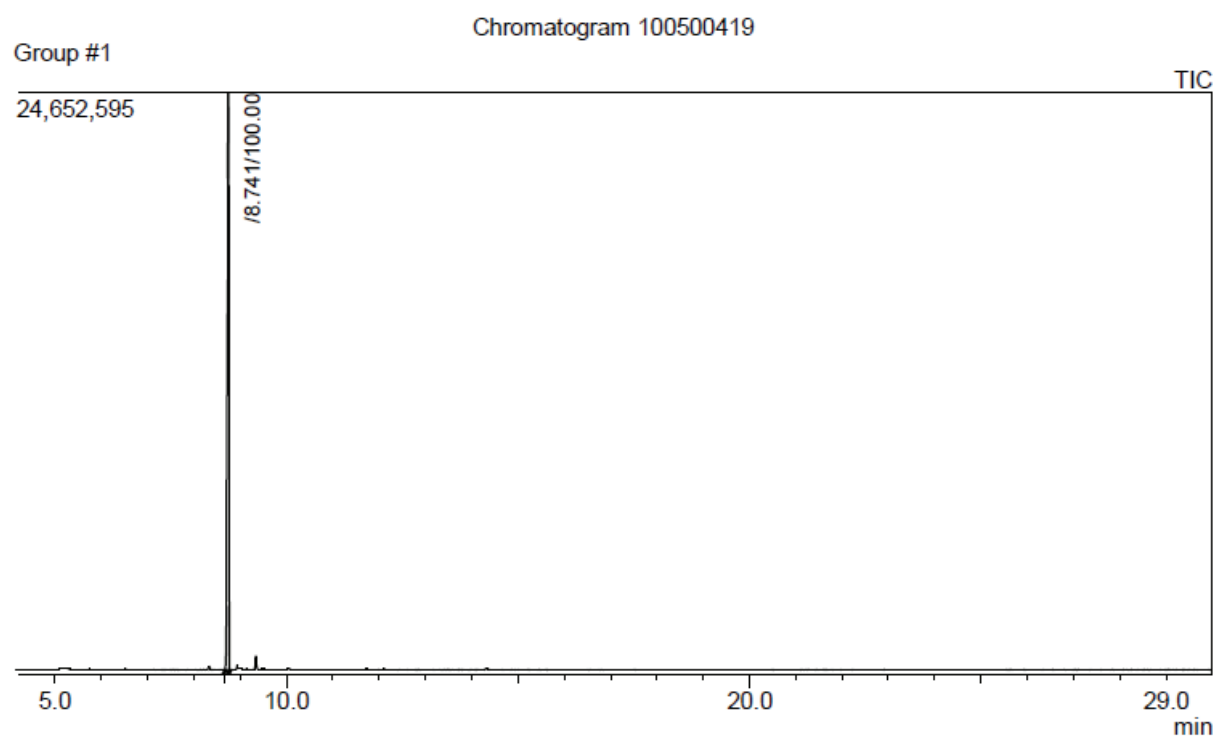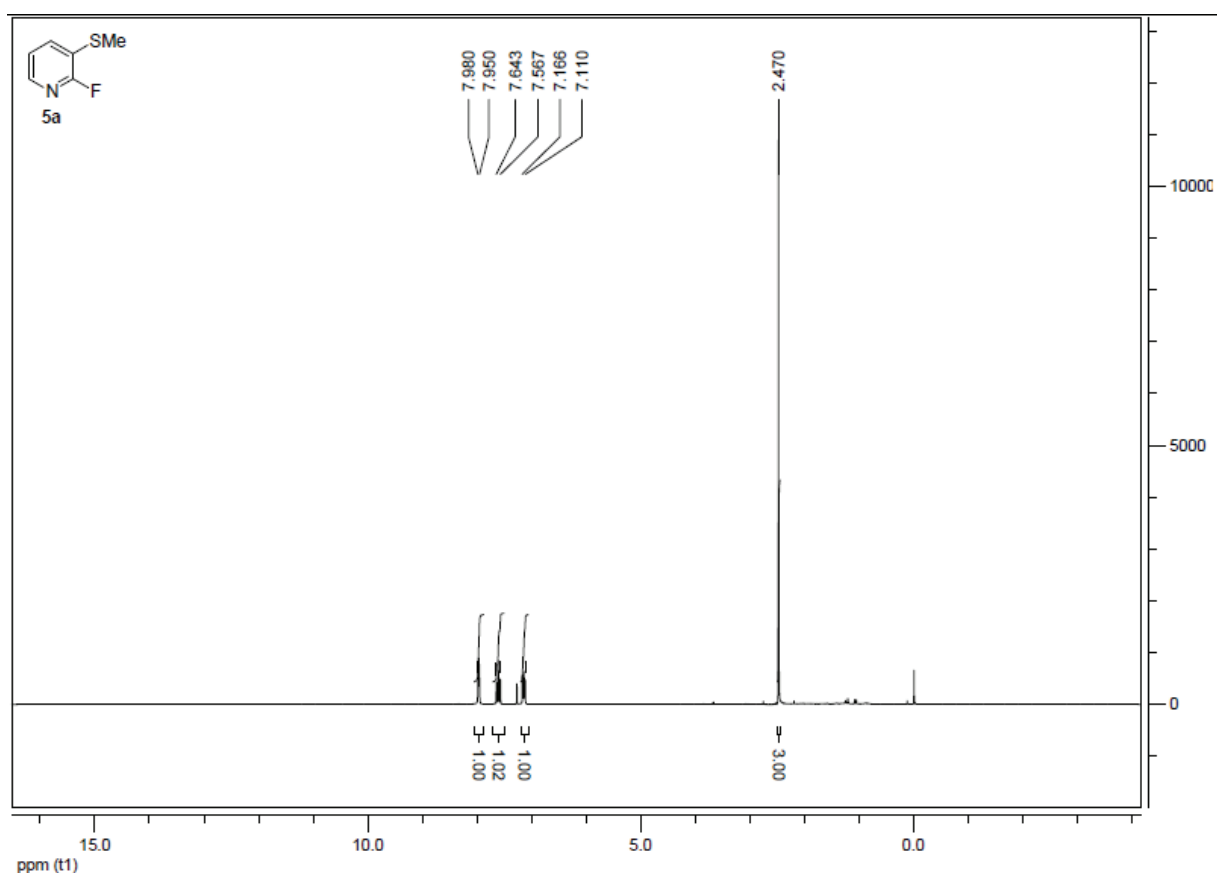

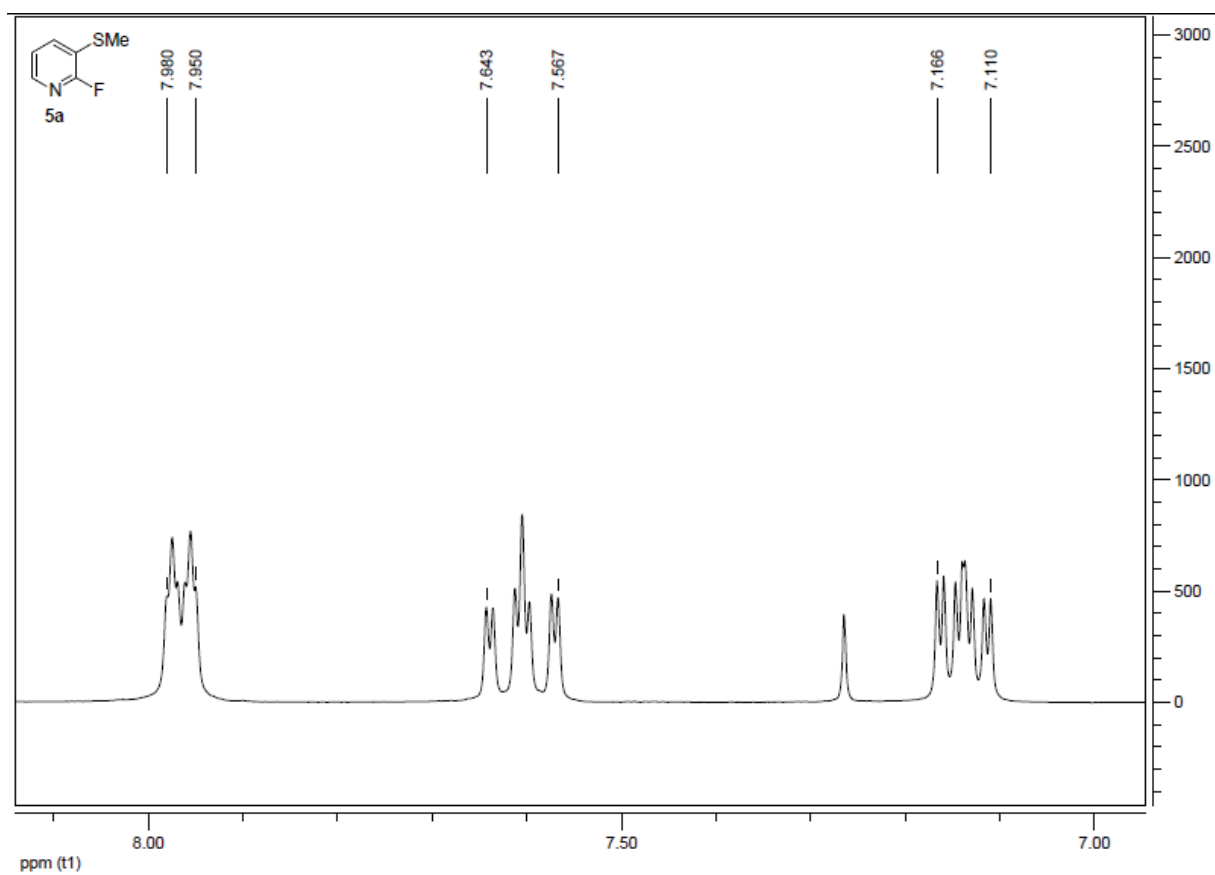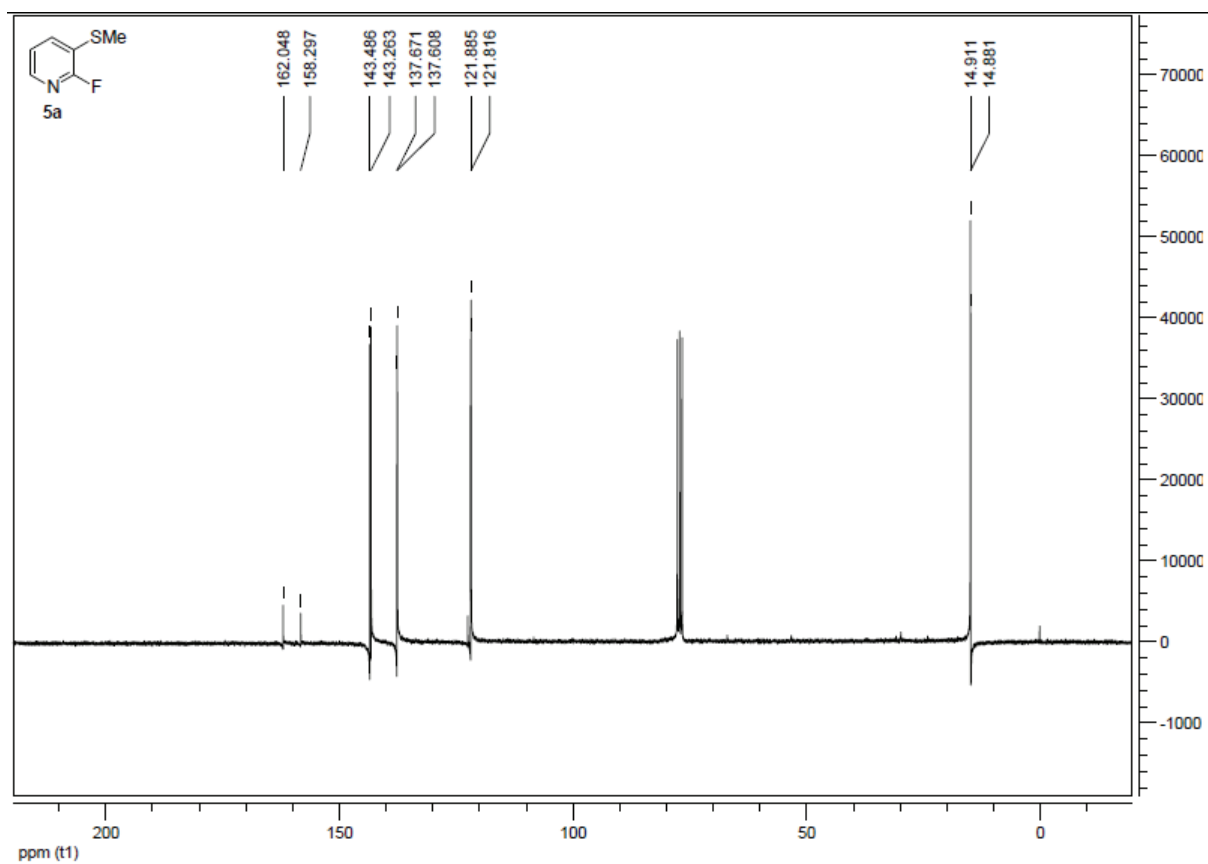

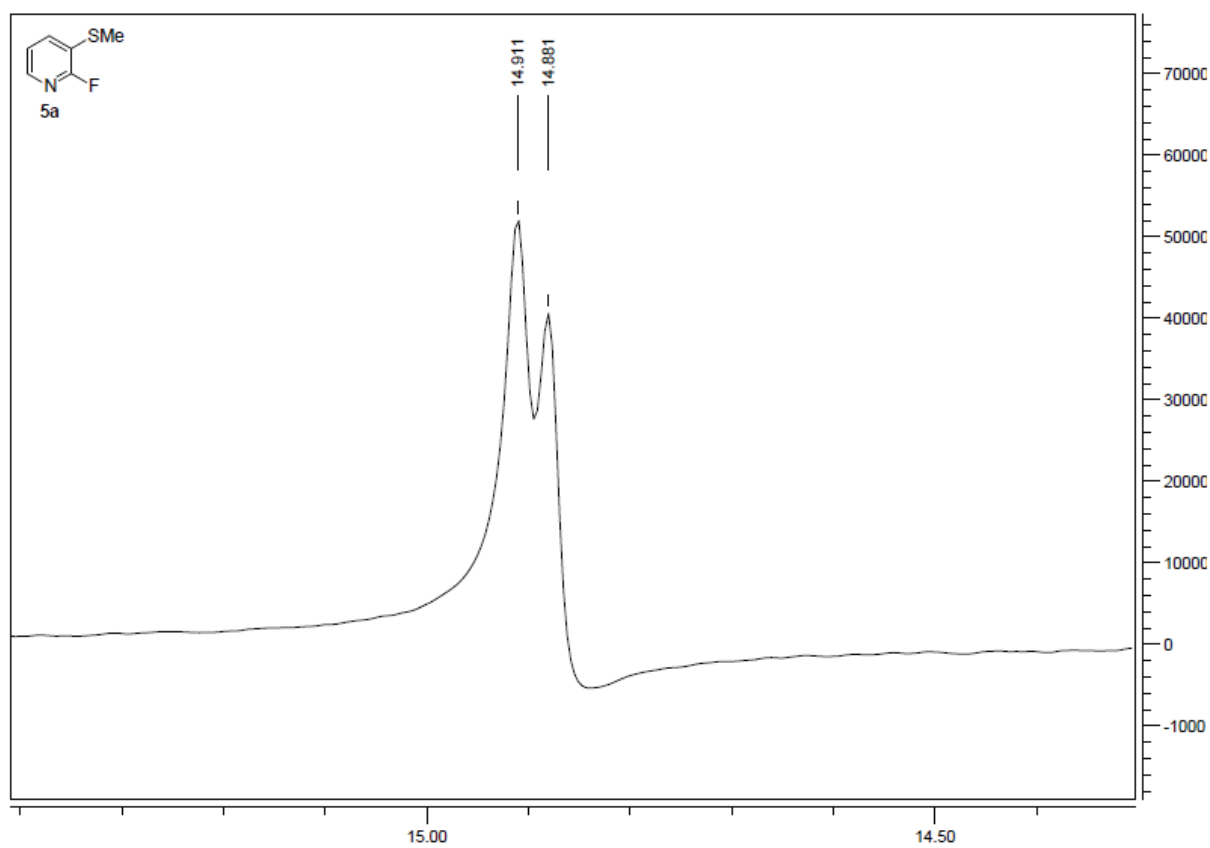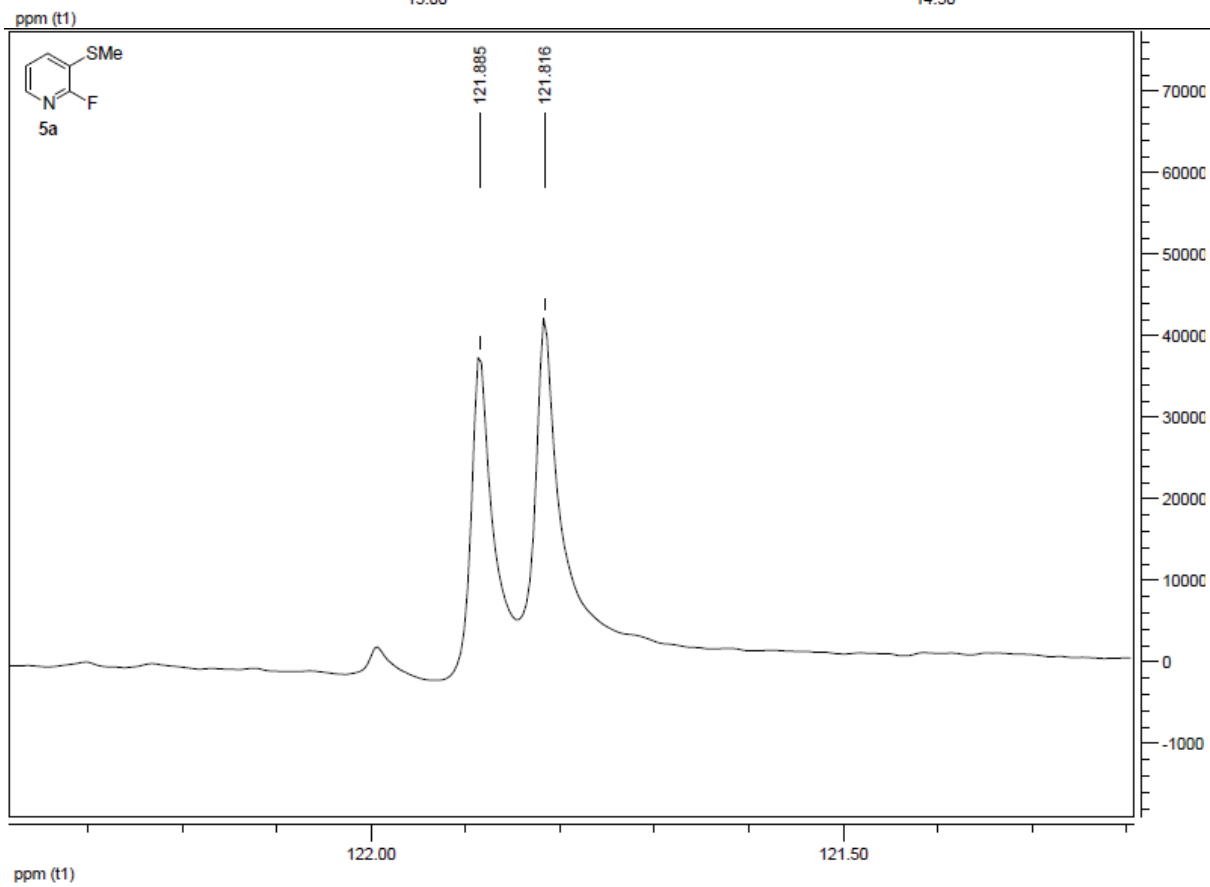

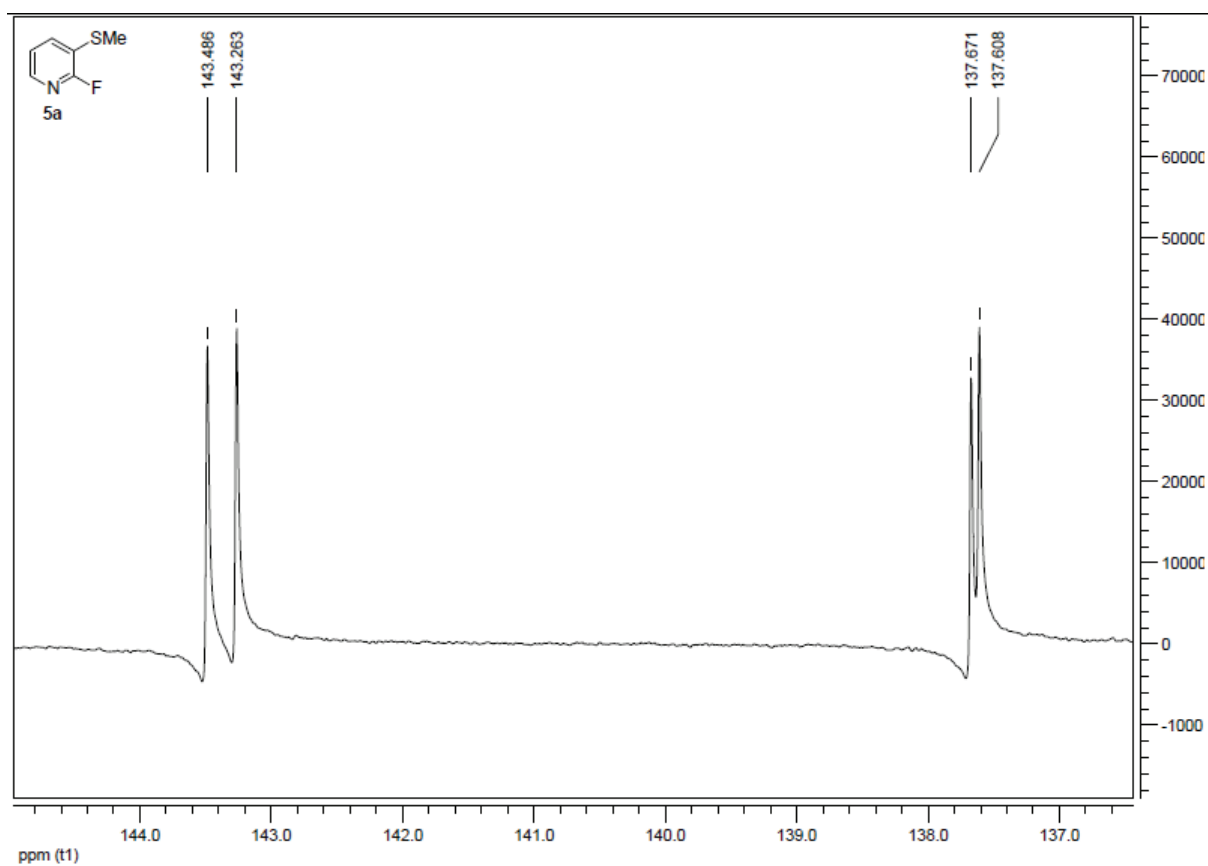

### GC, $^1\text{H}$ and $^{13}\text{C}$ for 4b.

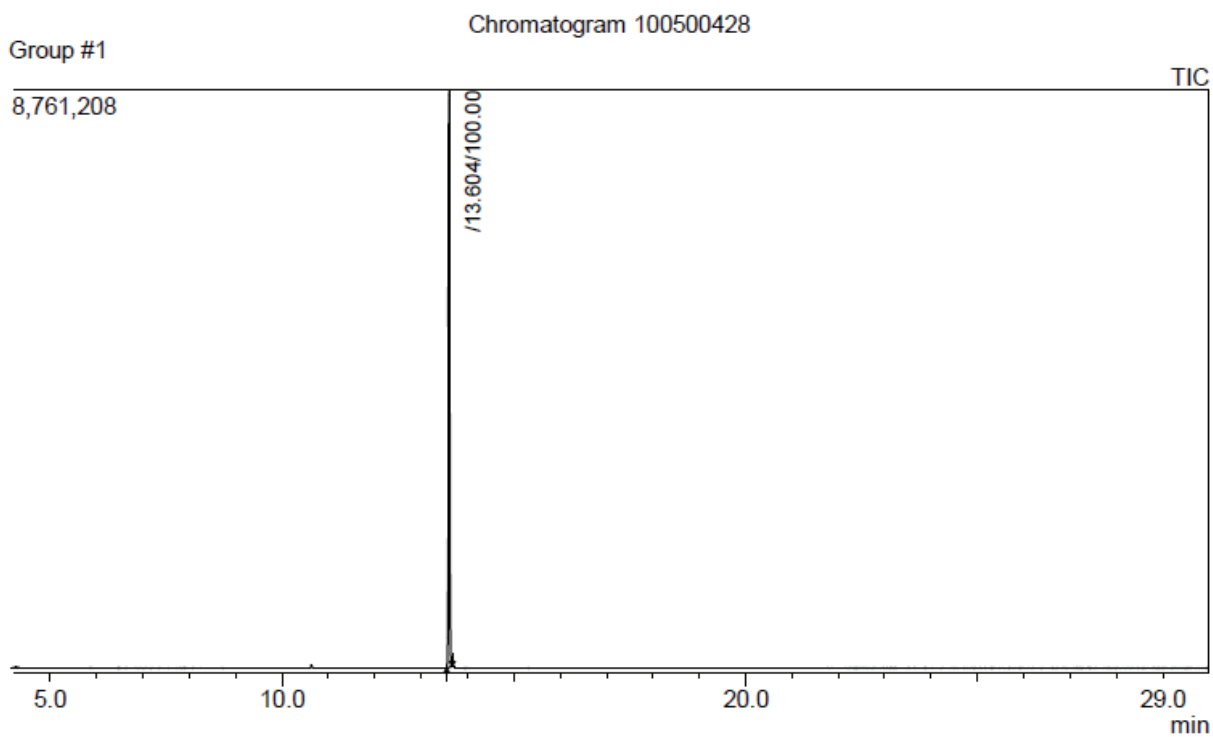

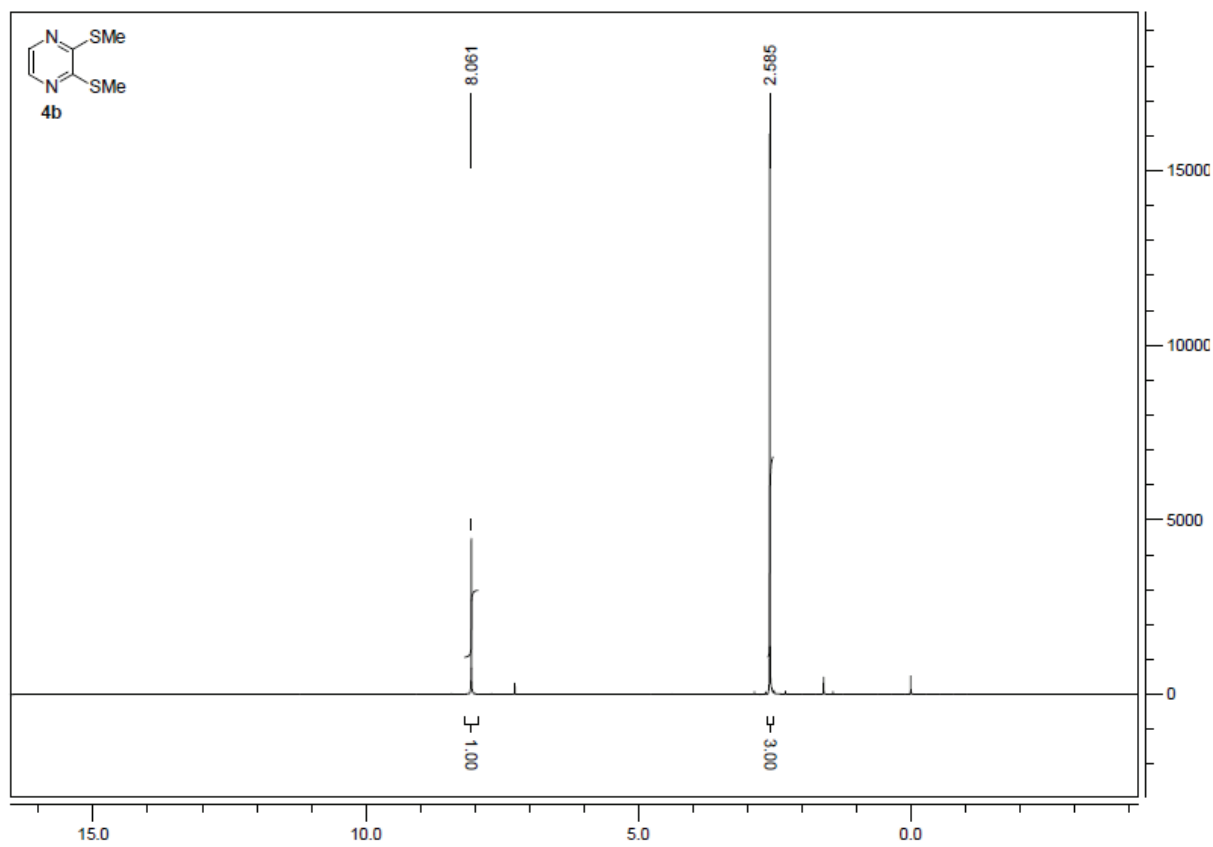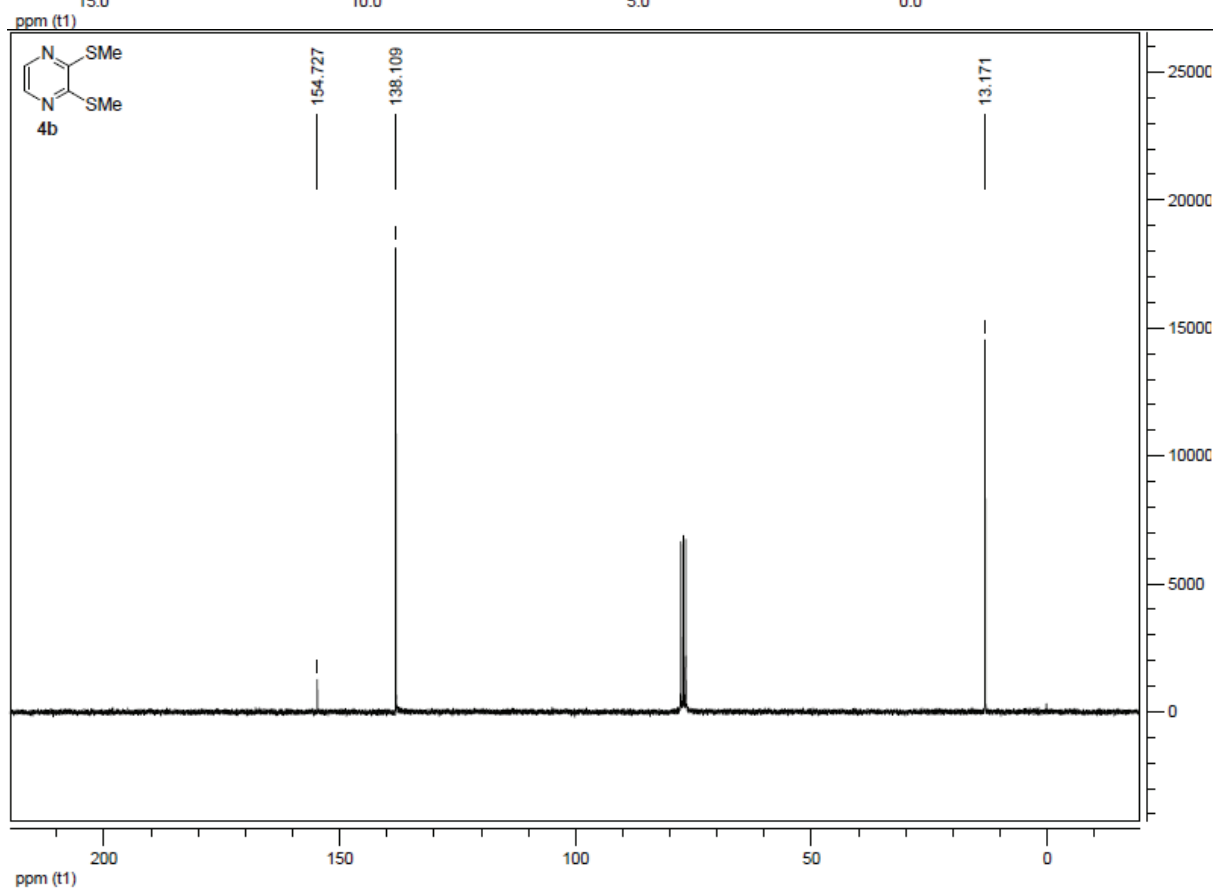



## GC, $^1\text{H}$ and $^{13}\text{C}$ for 5b.

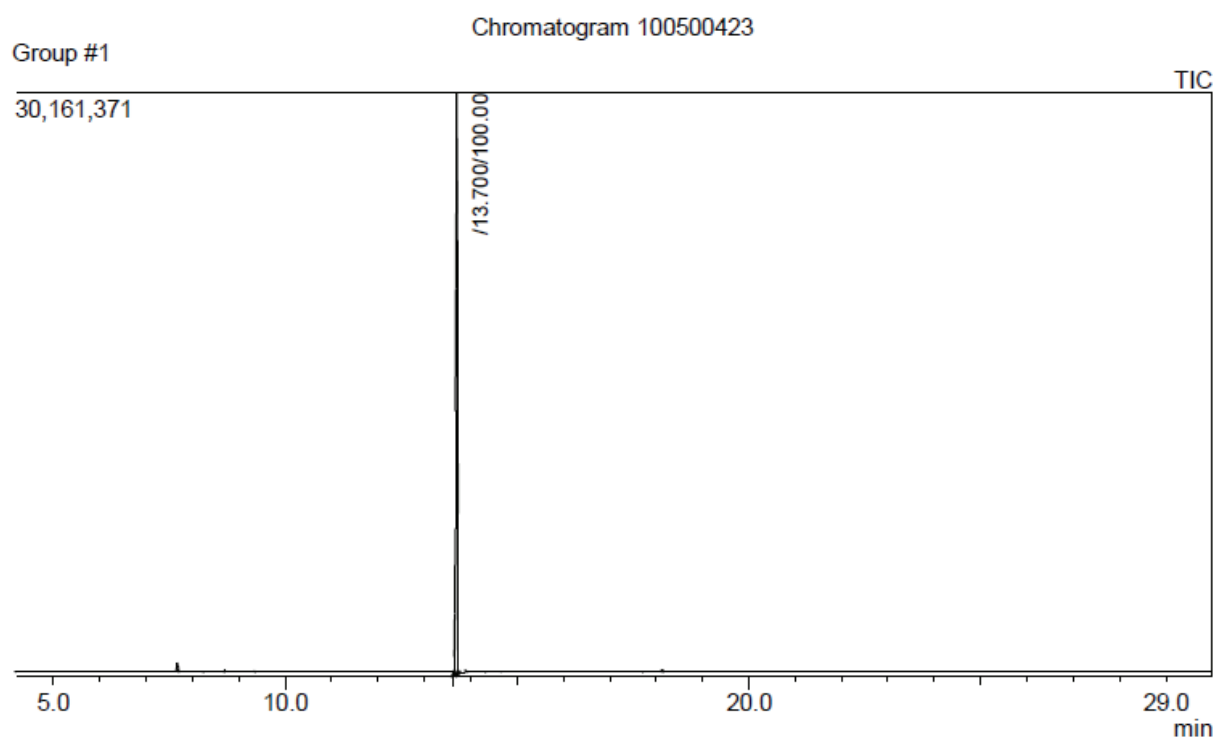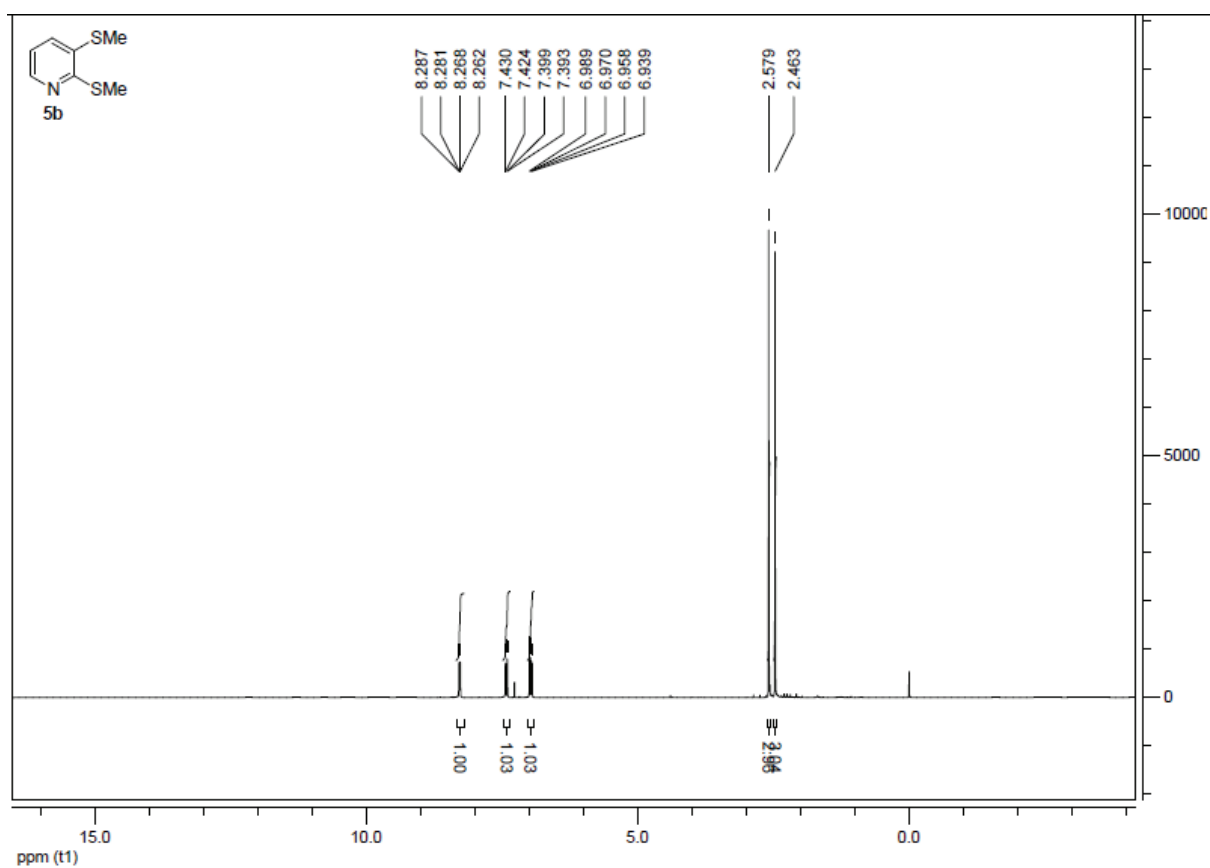

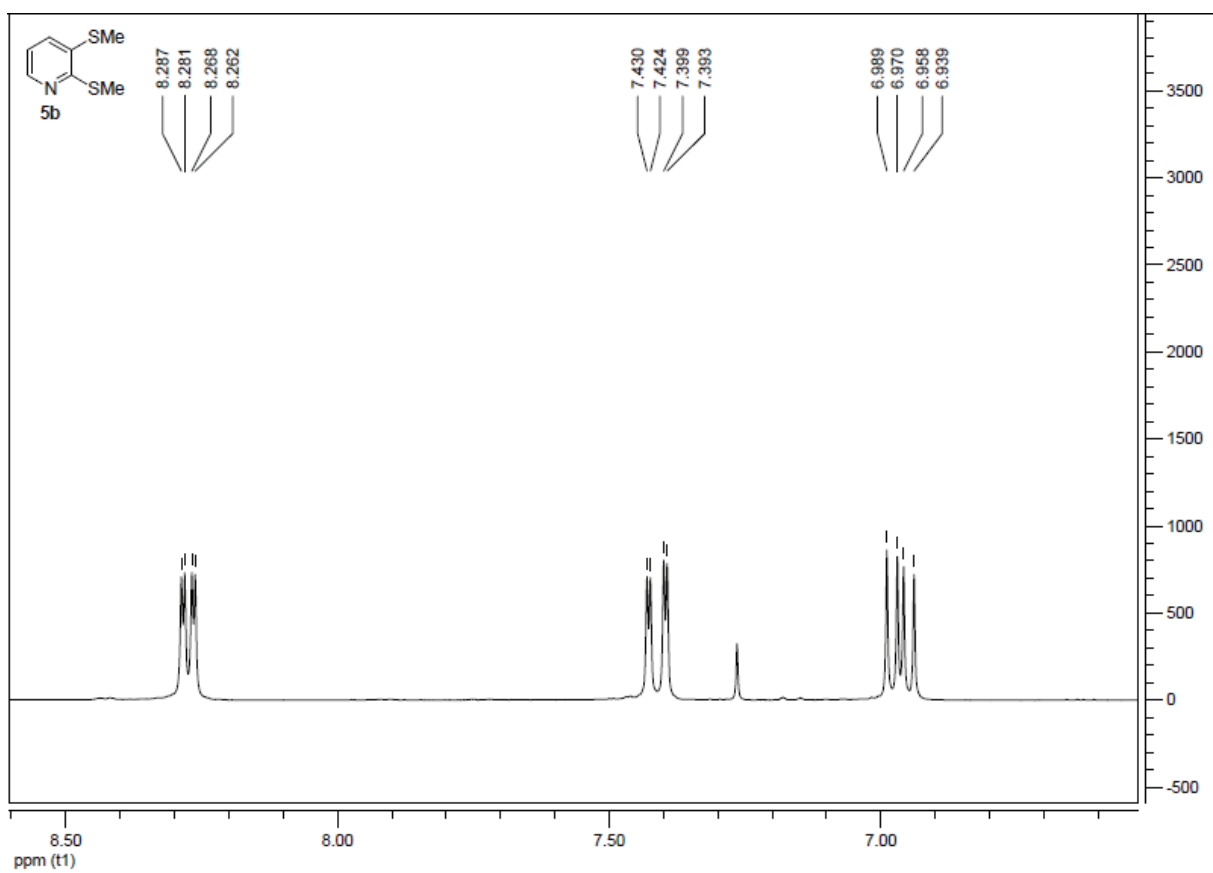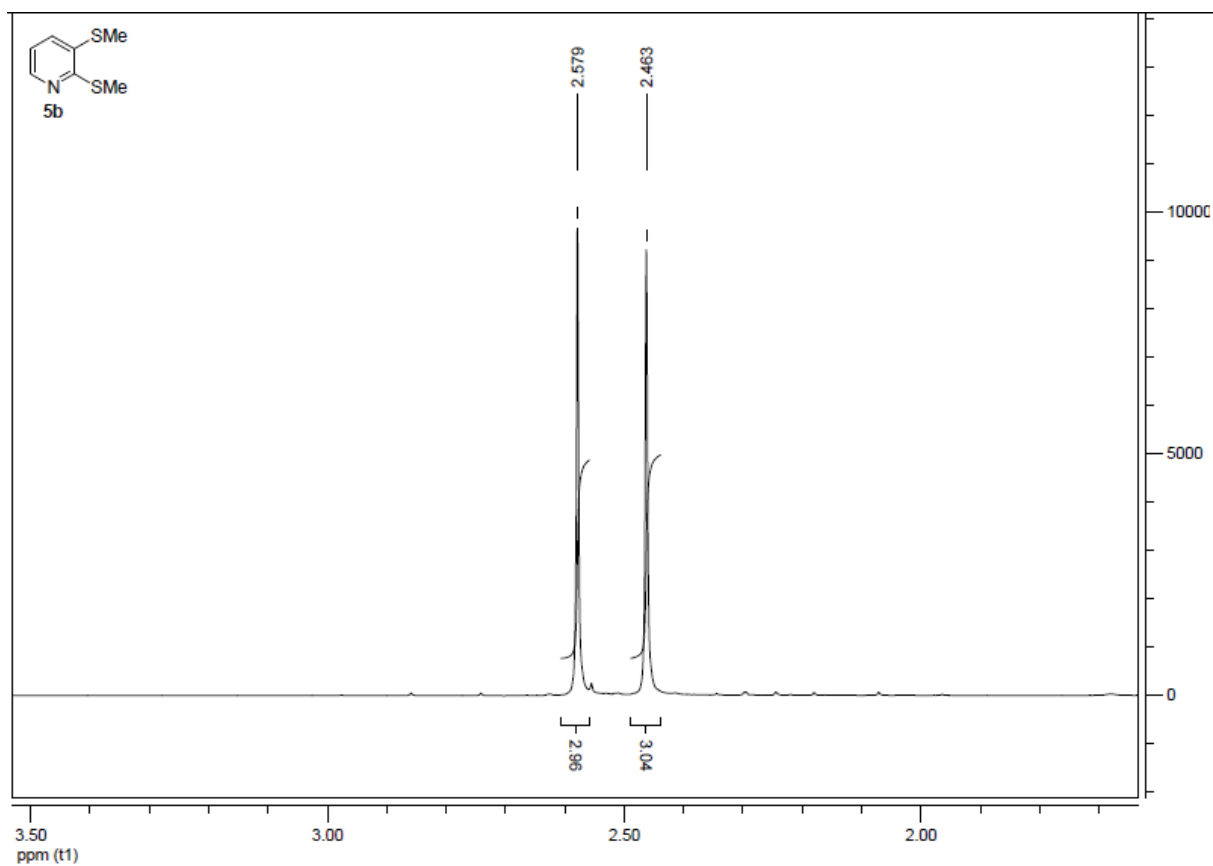

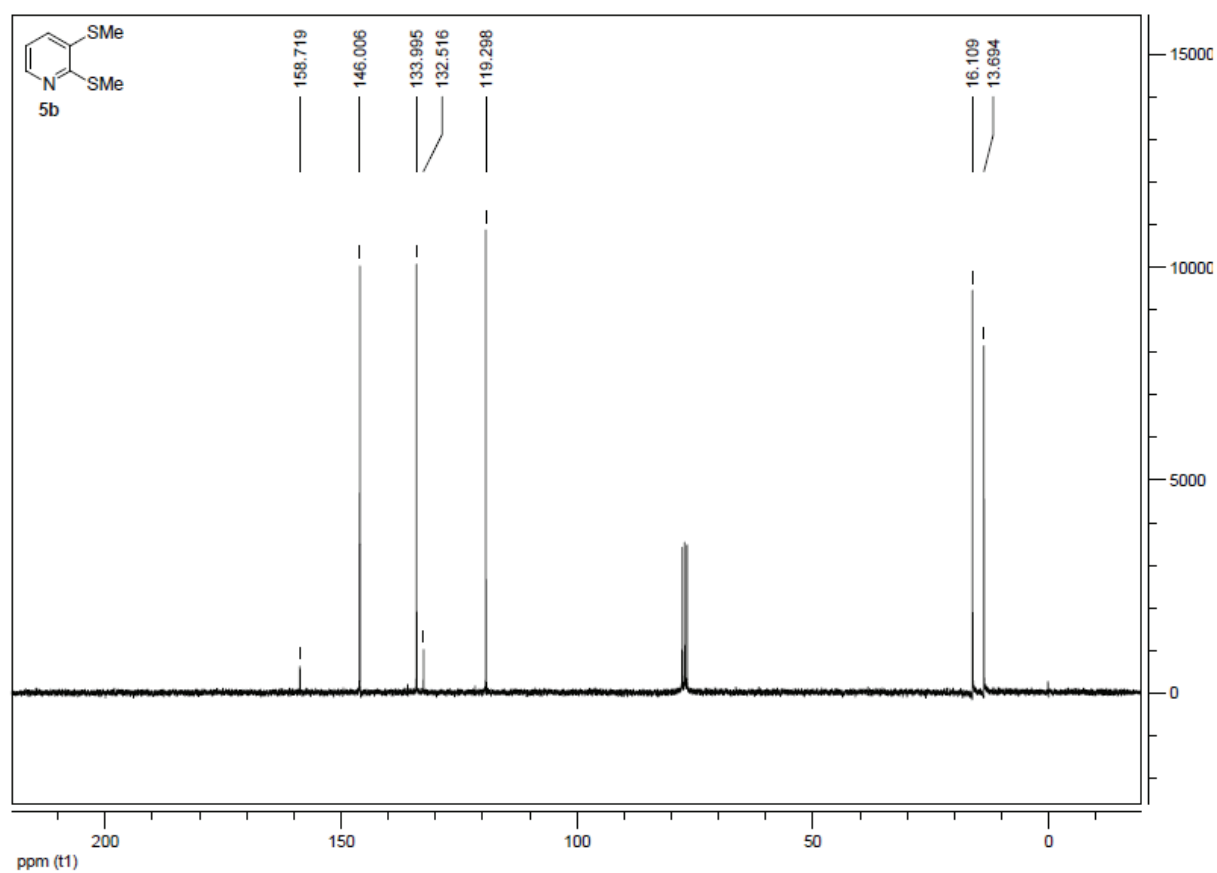

**GC, <sup>1</sup>H and <sup>13</sup>C for 7b (+7a).**

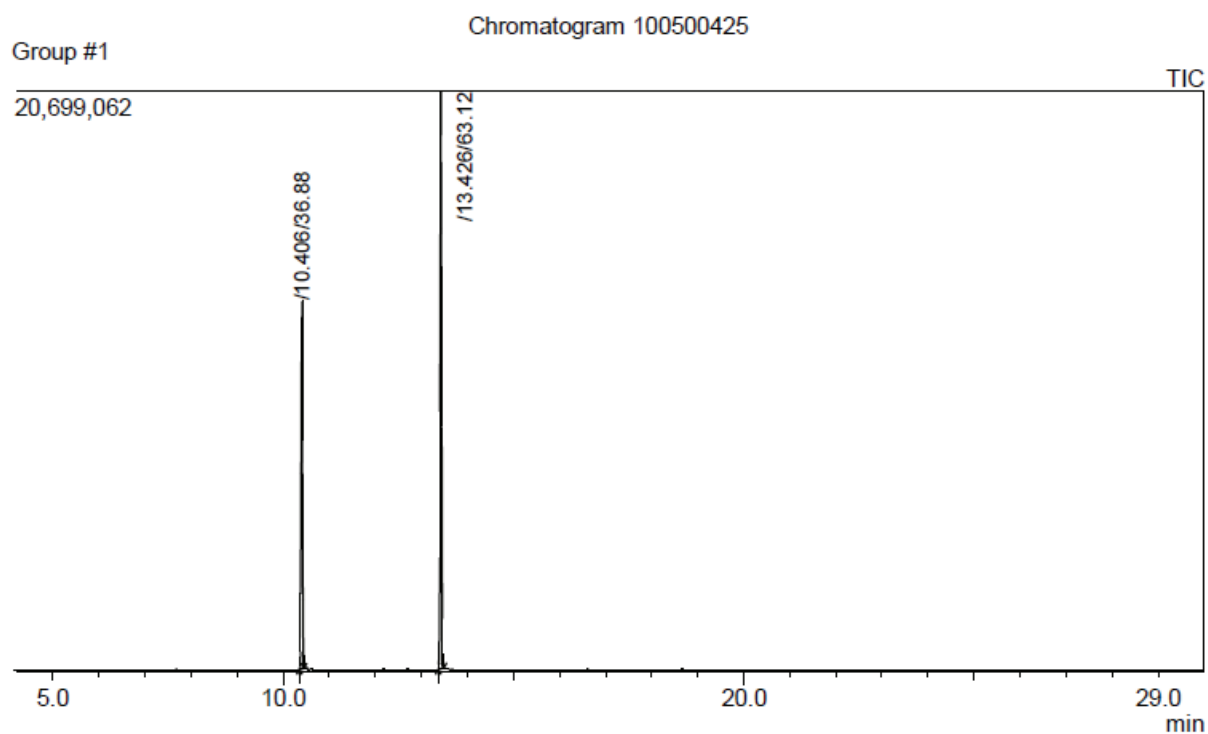

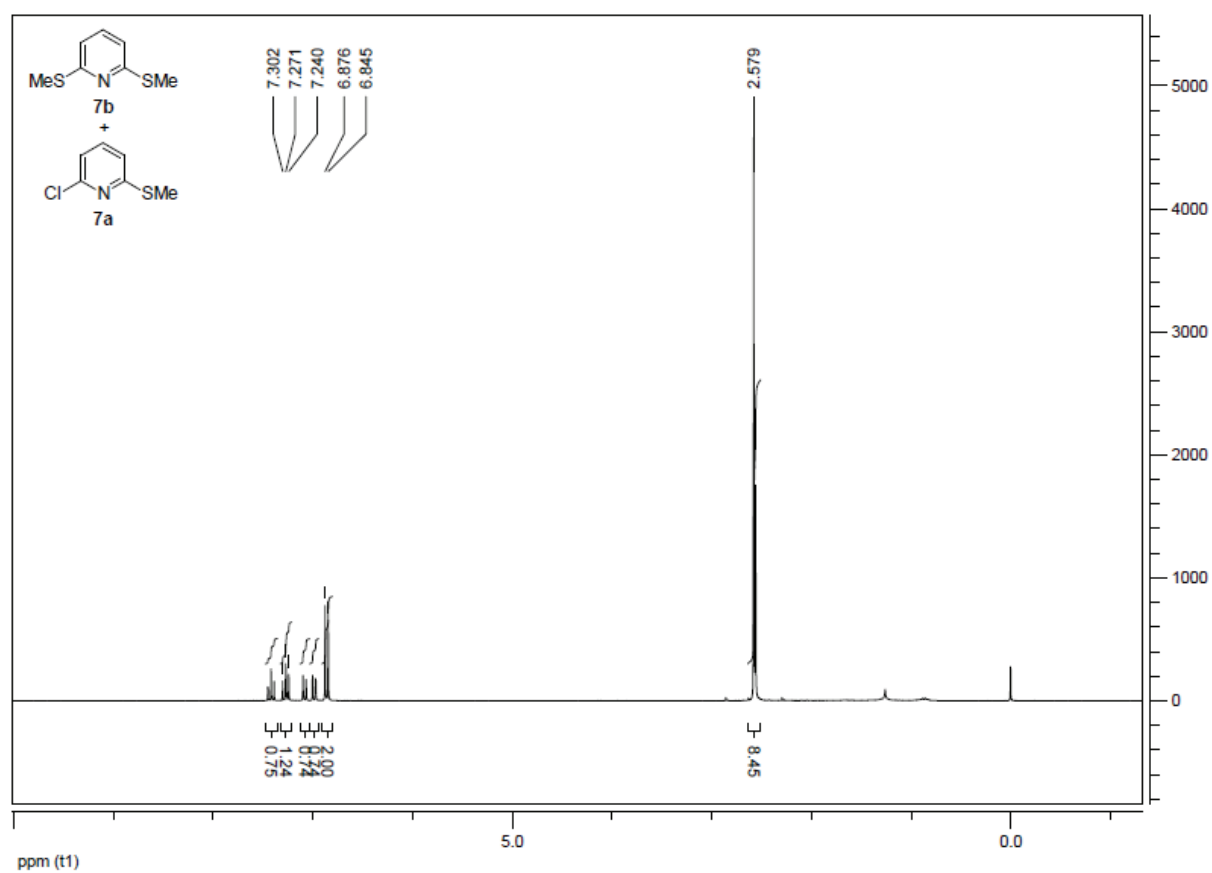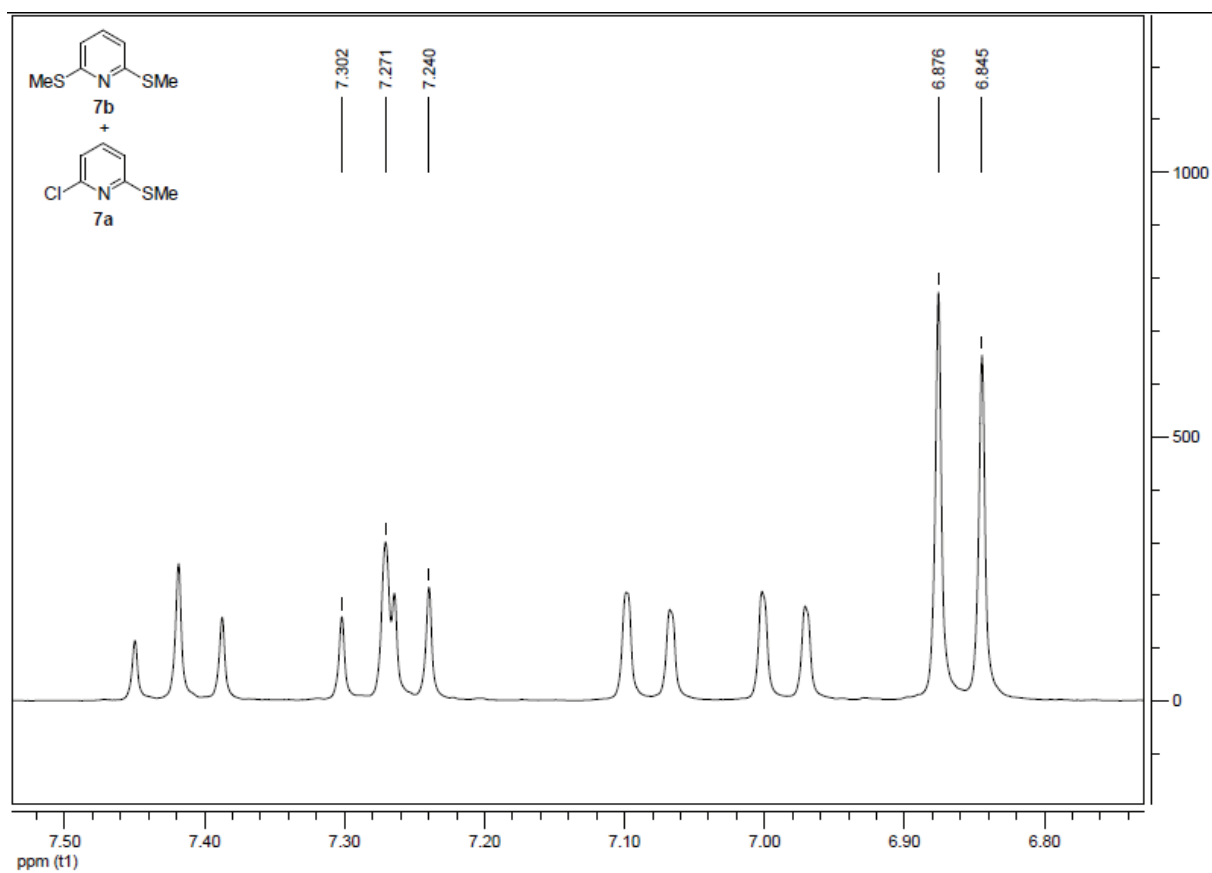

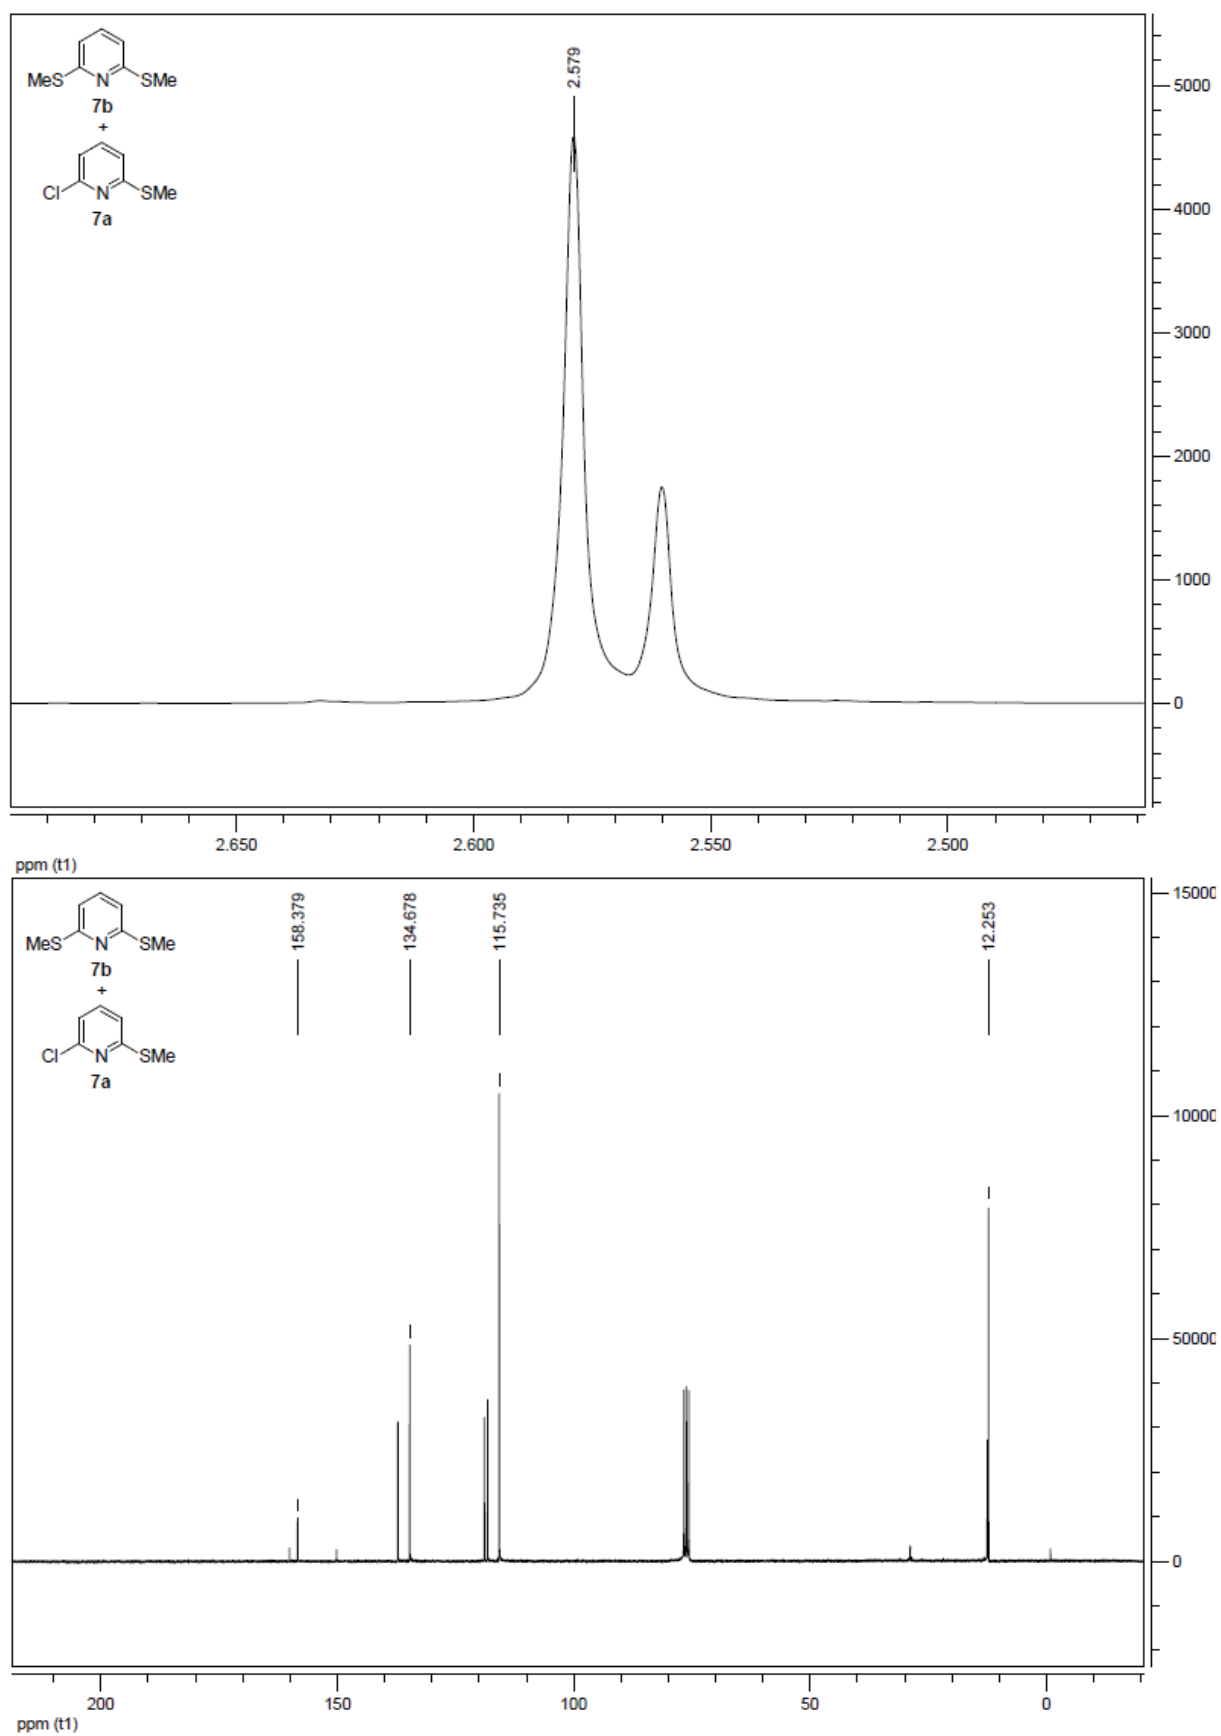

## GC, $^1\text{H}$ and $^{13}\text{C}$ for 8.

Chromatogram AC327

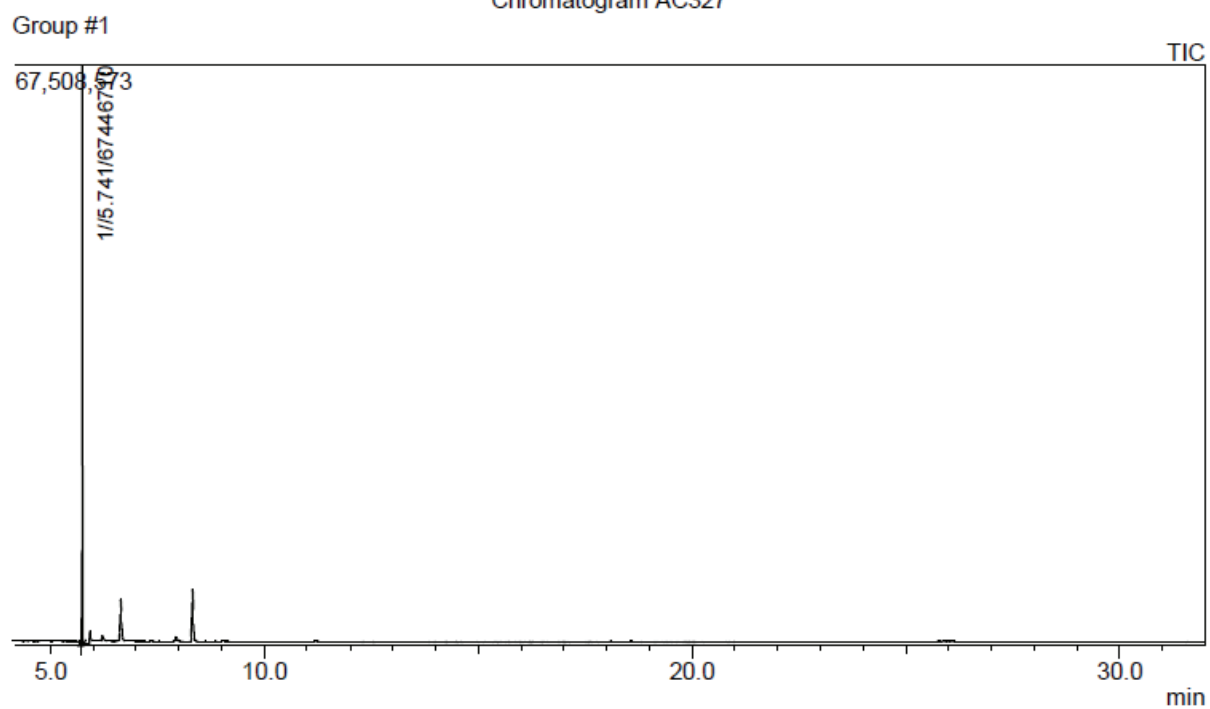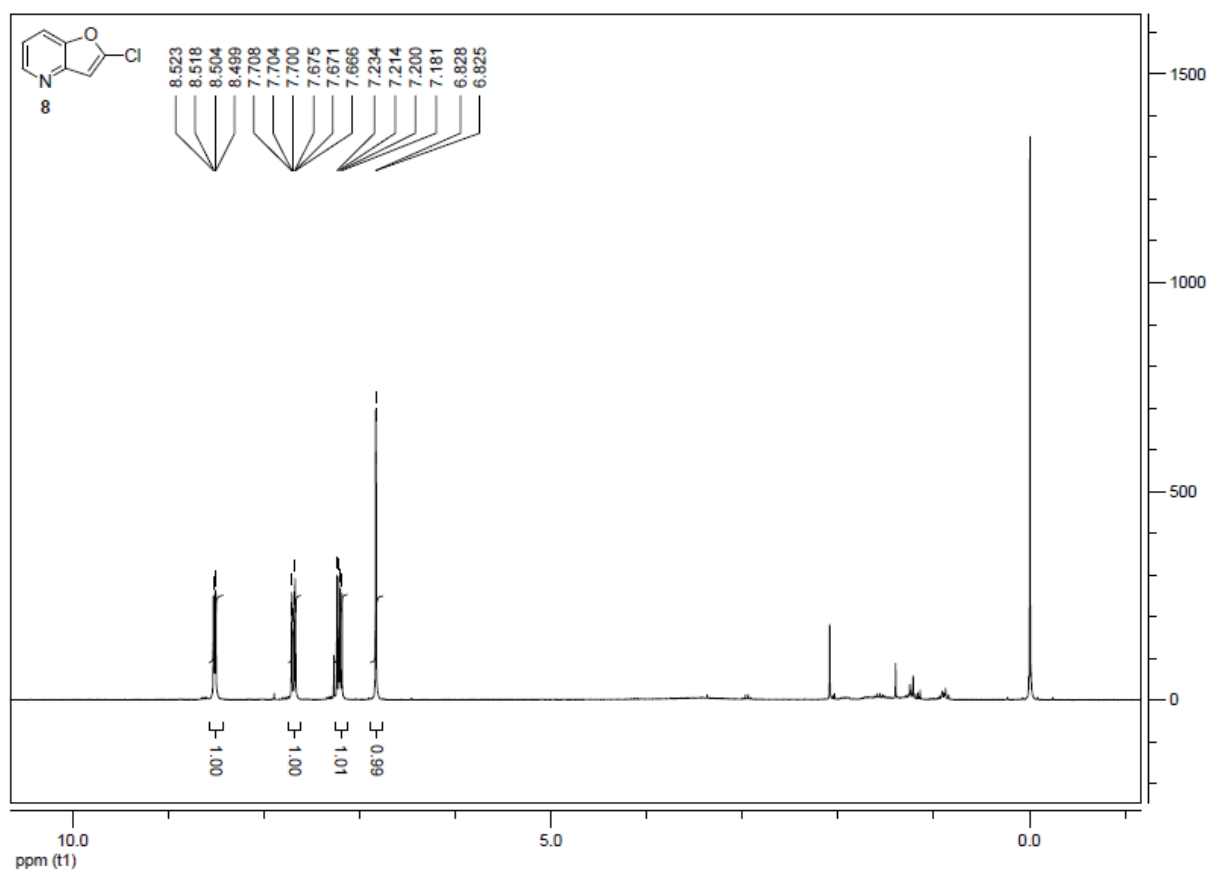

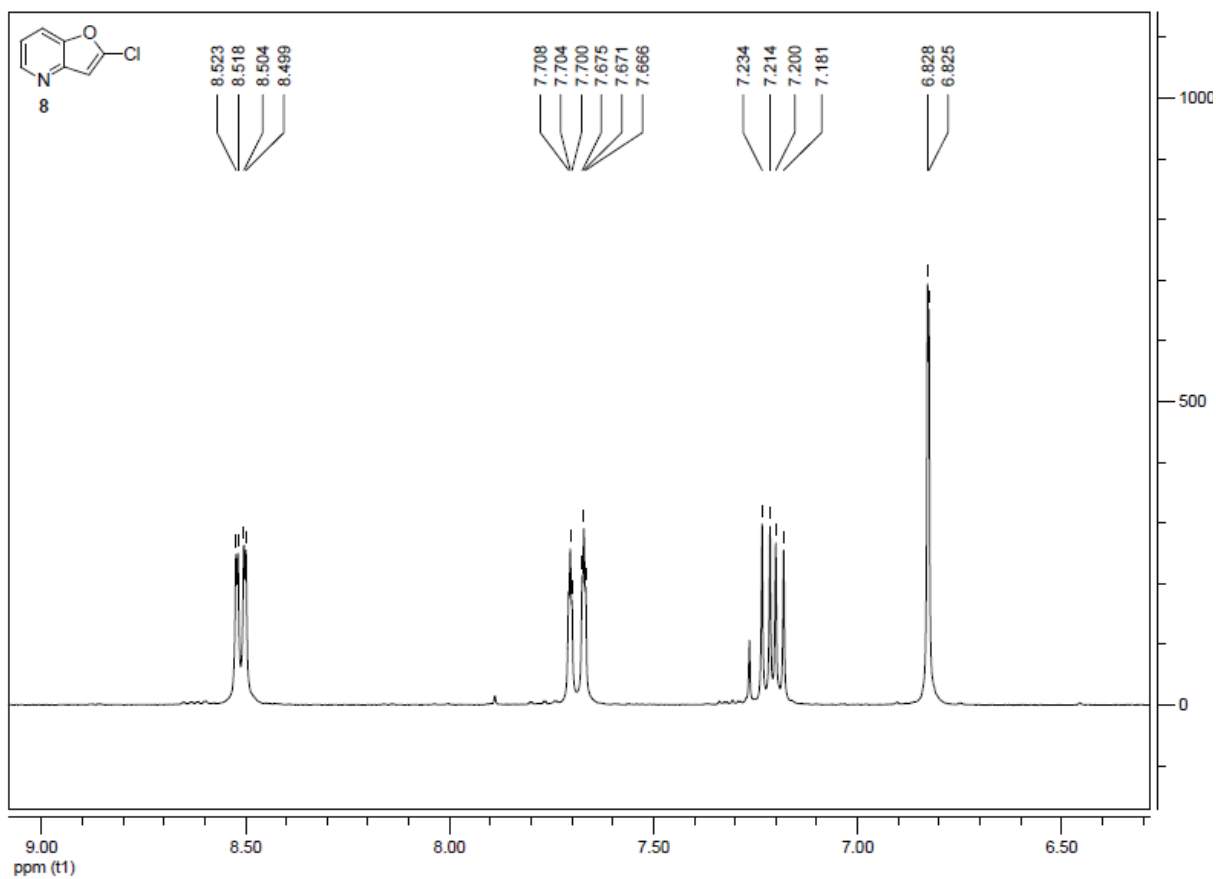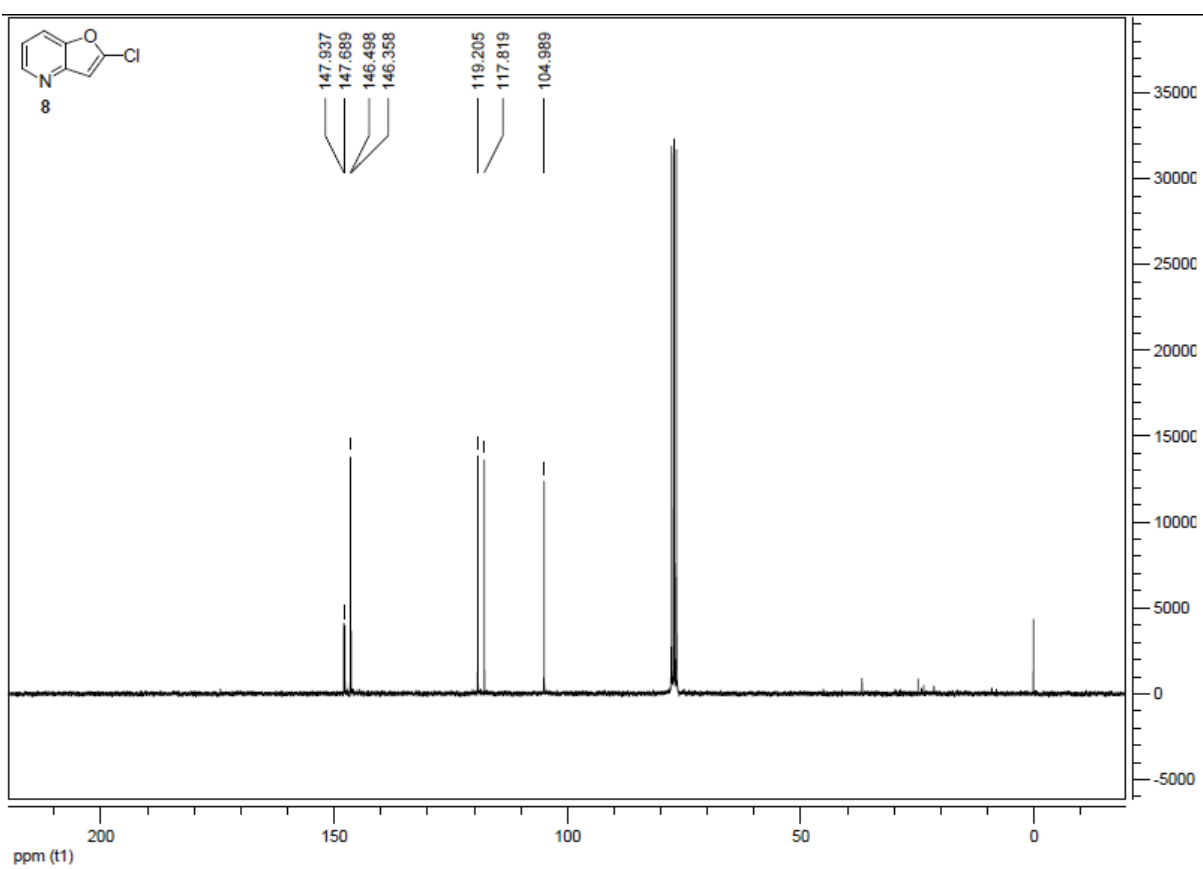

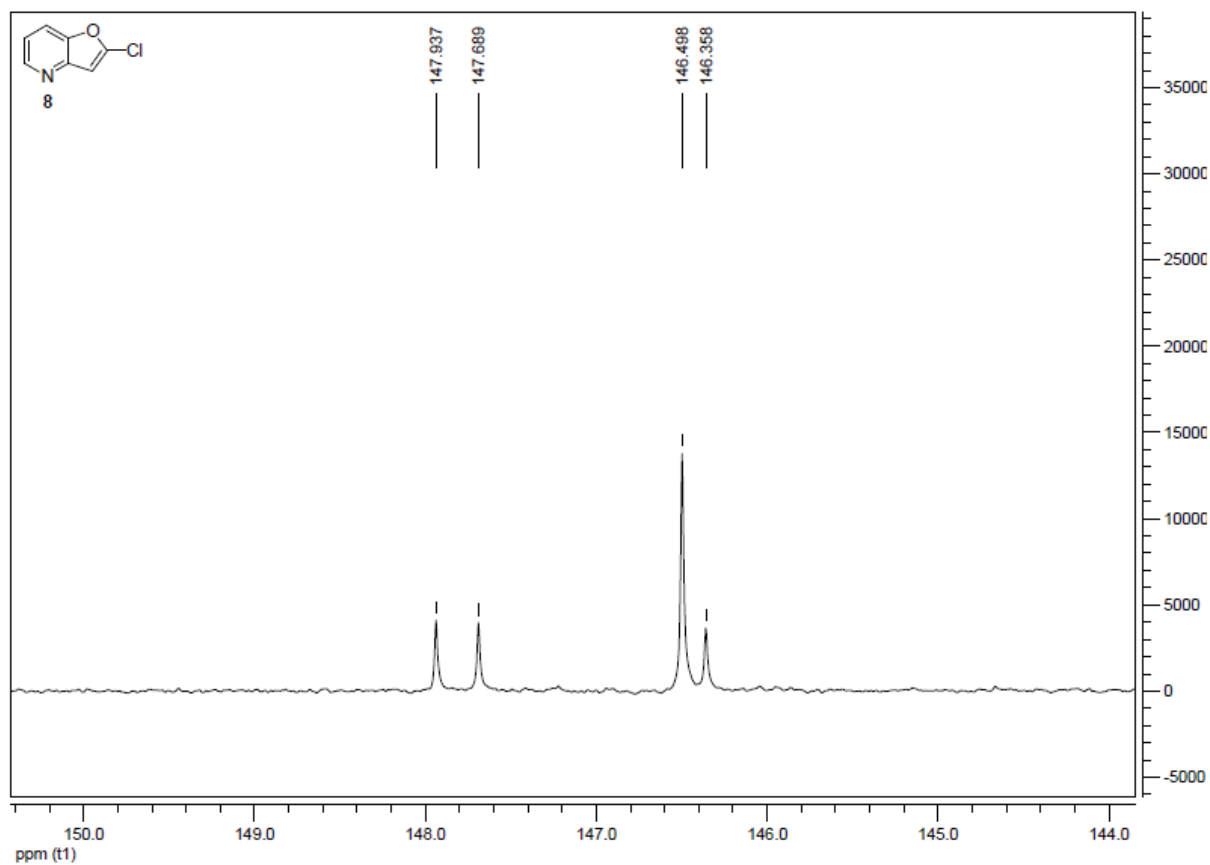

### GC, <sup>1</sup>H and <sup>13</sup>C for 9b.

Chromatogram 100500443

Group #1

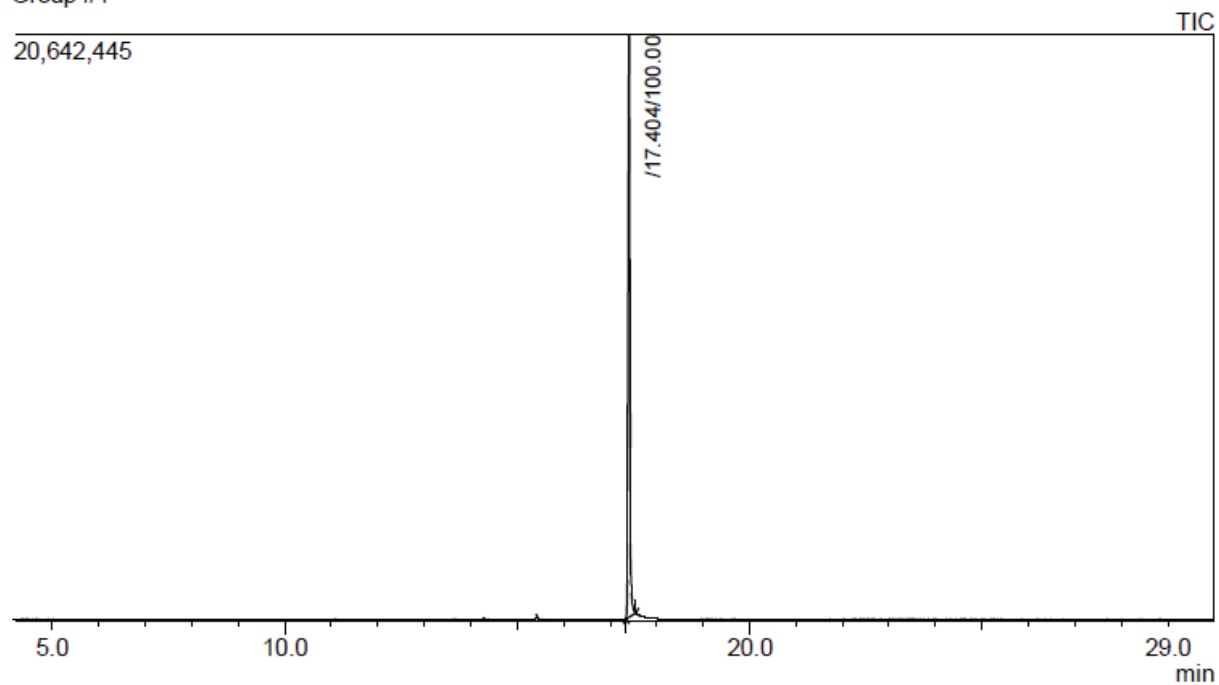



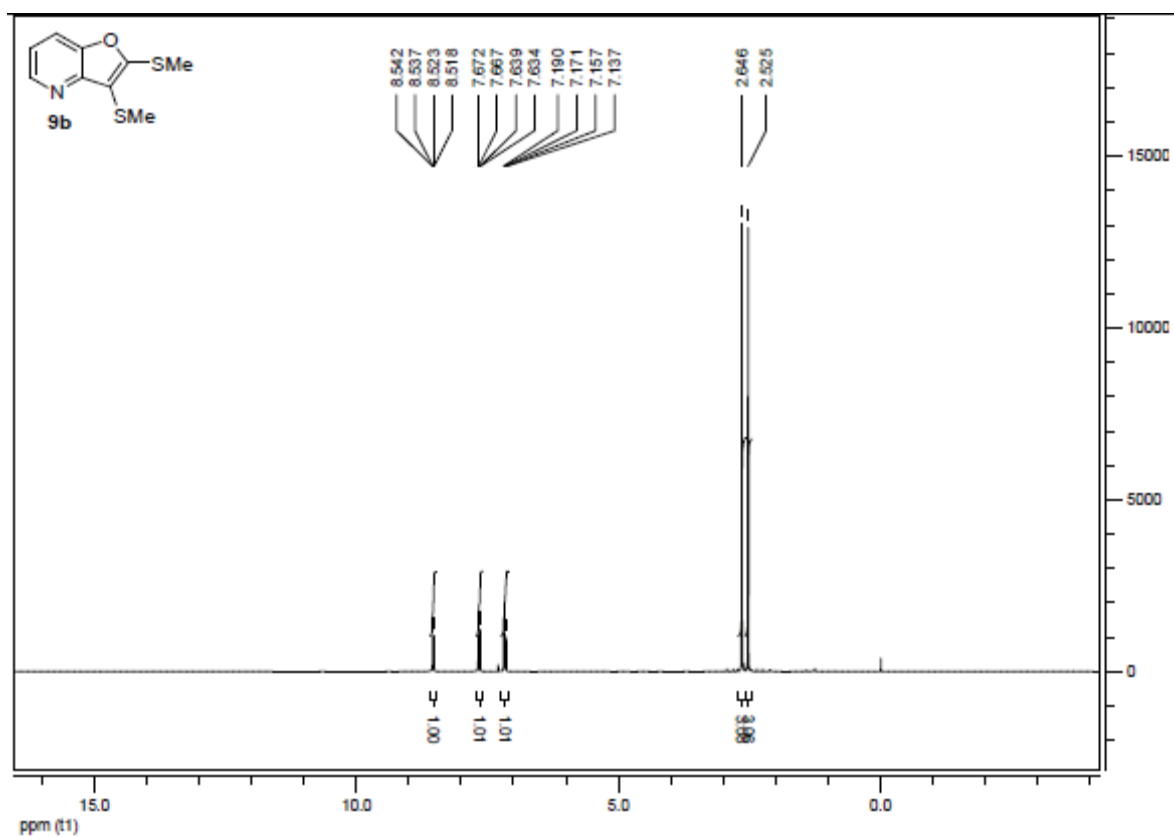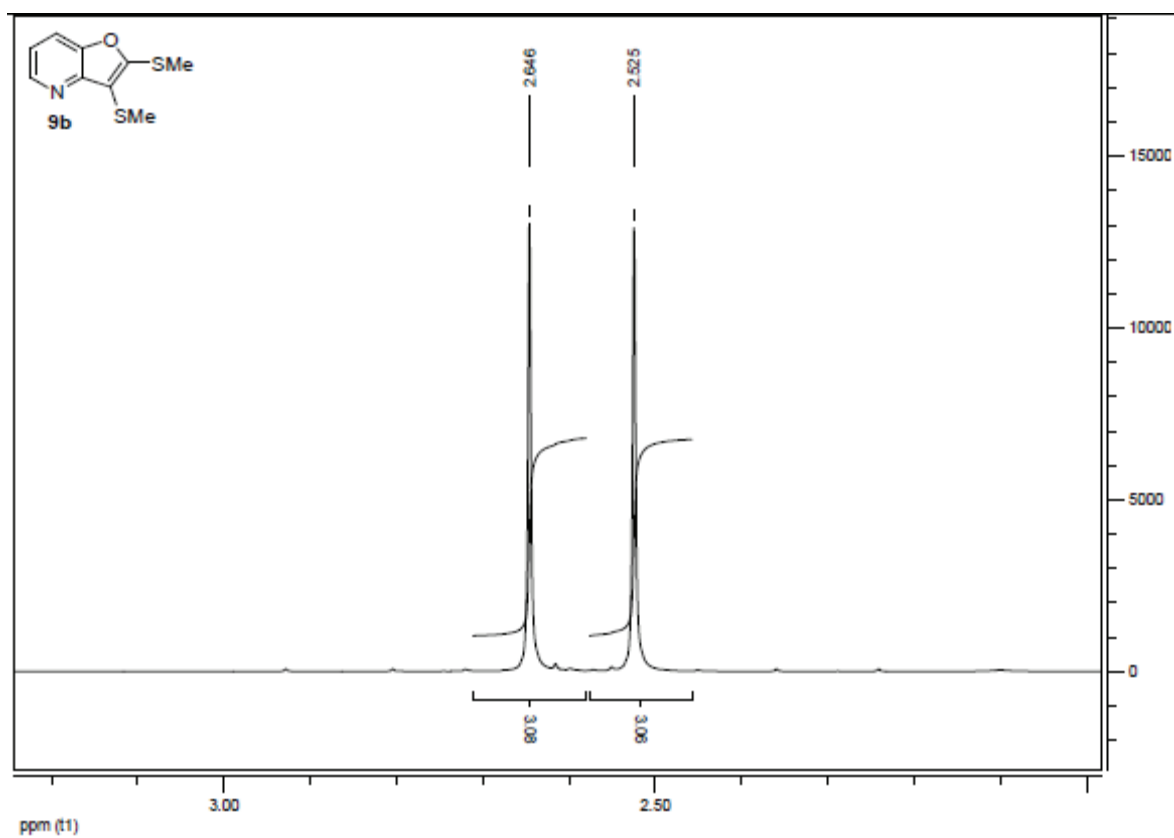

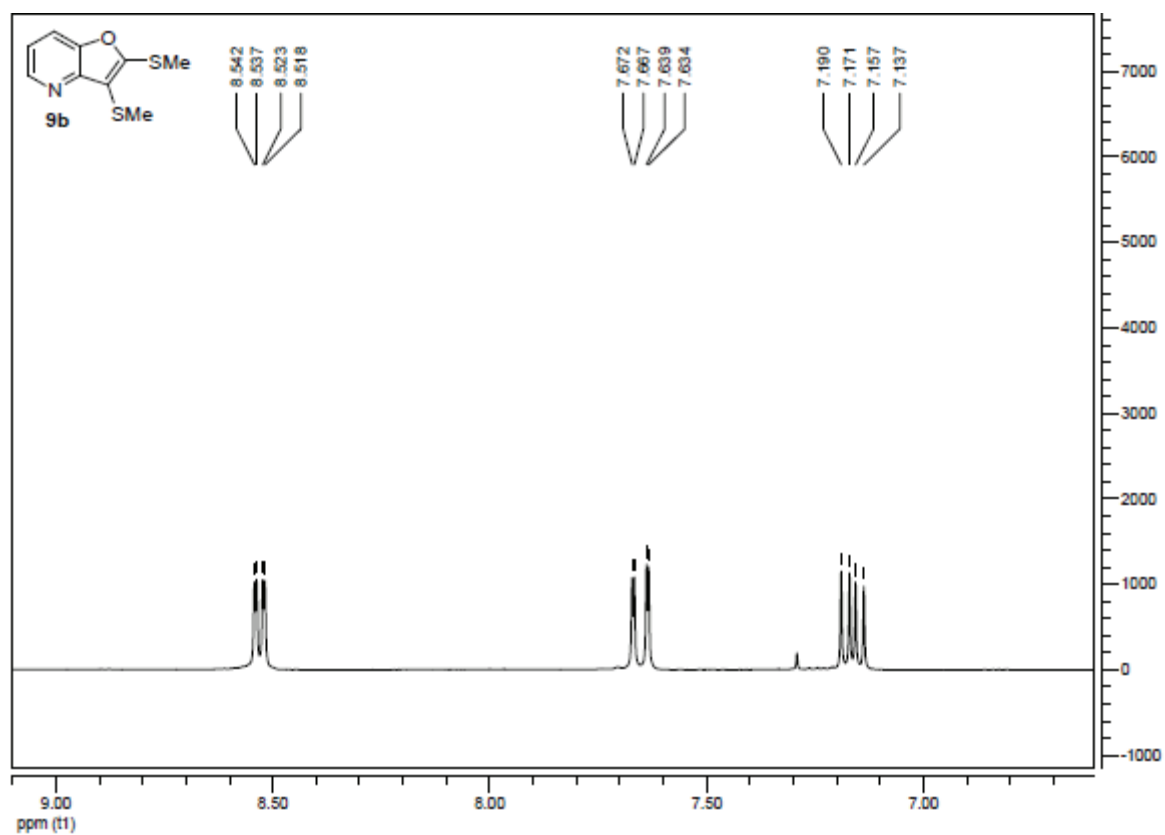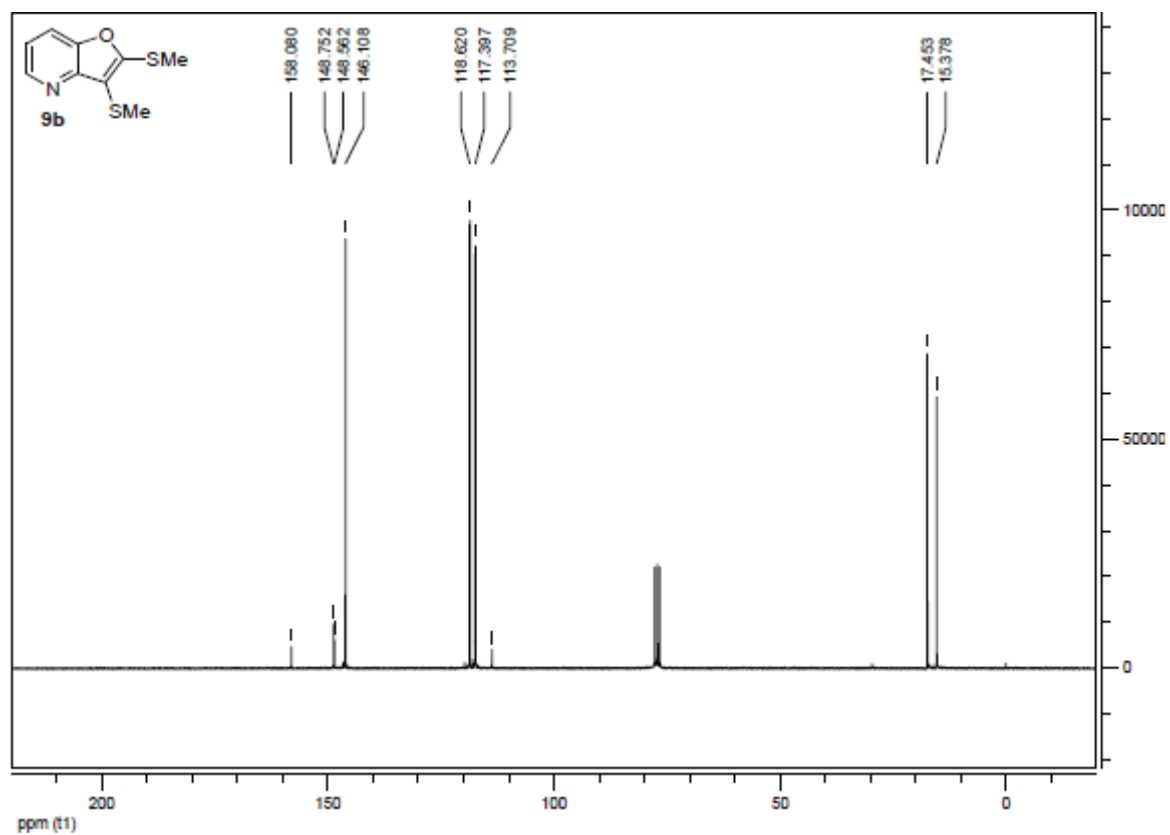

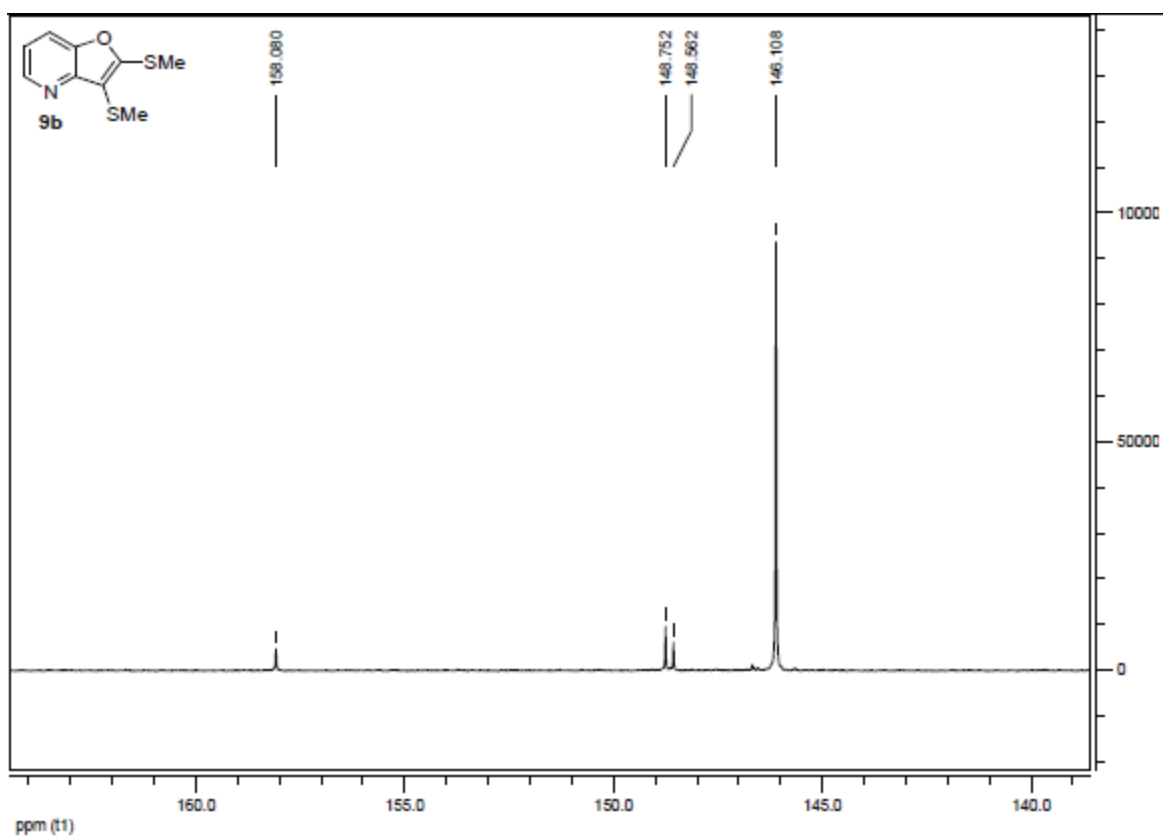

GC, <sup>1</sup>H and <sup>13</sup>C for 10b.

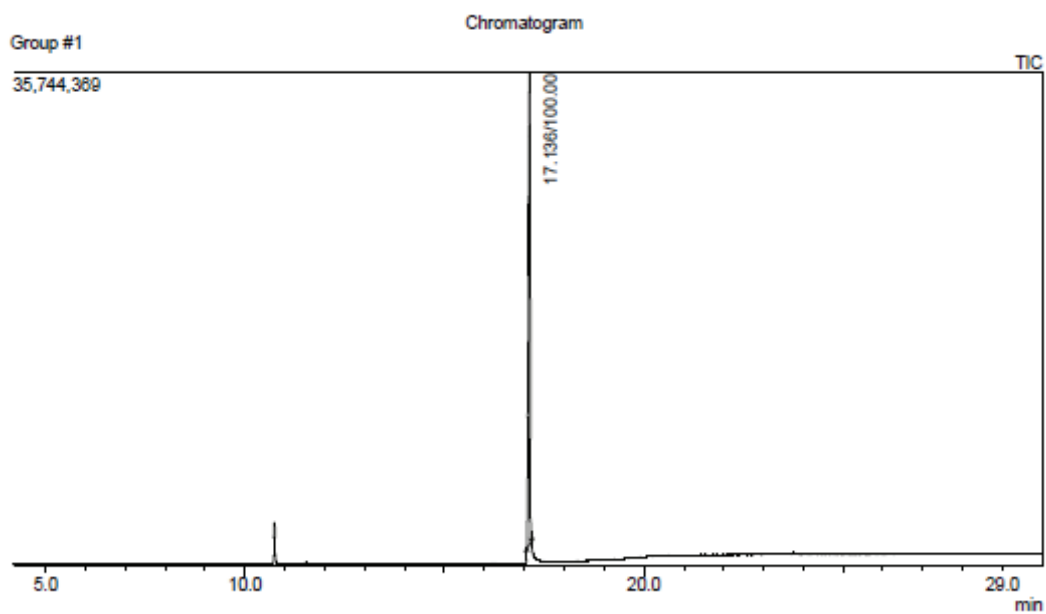

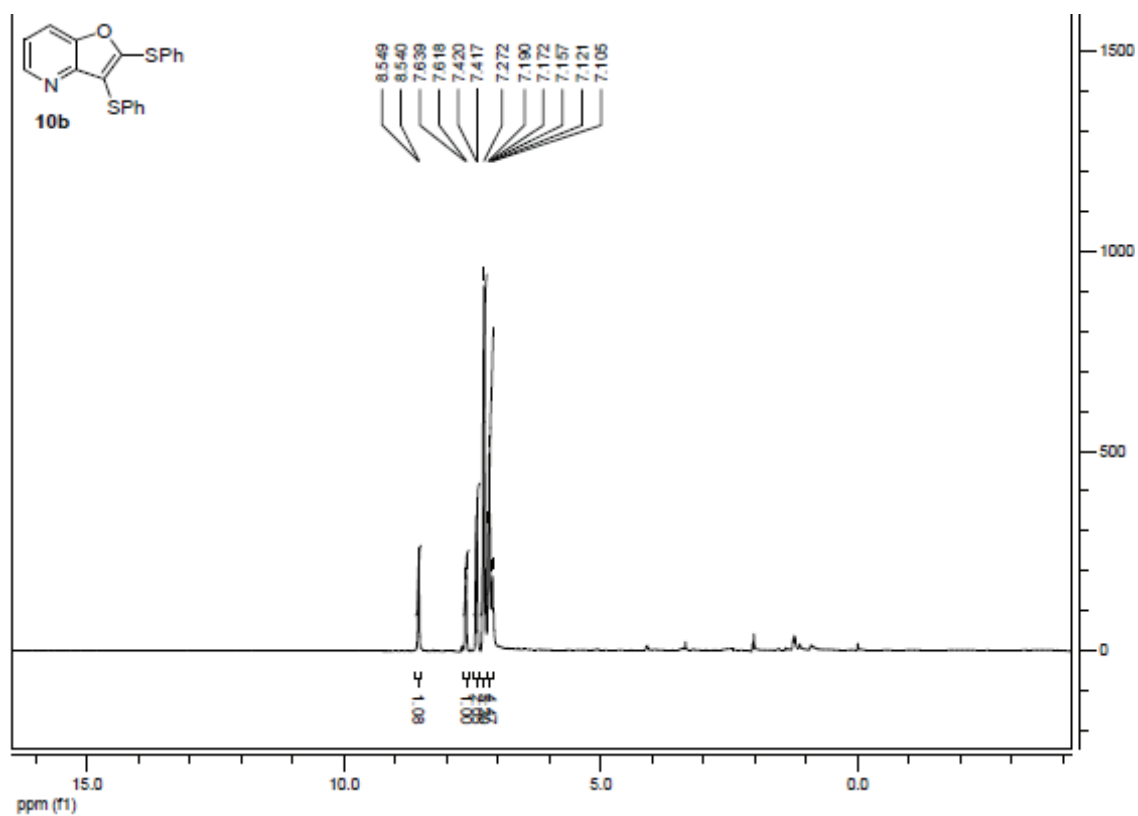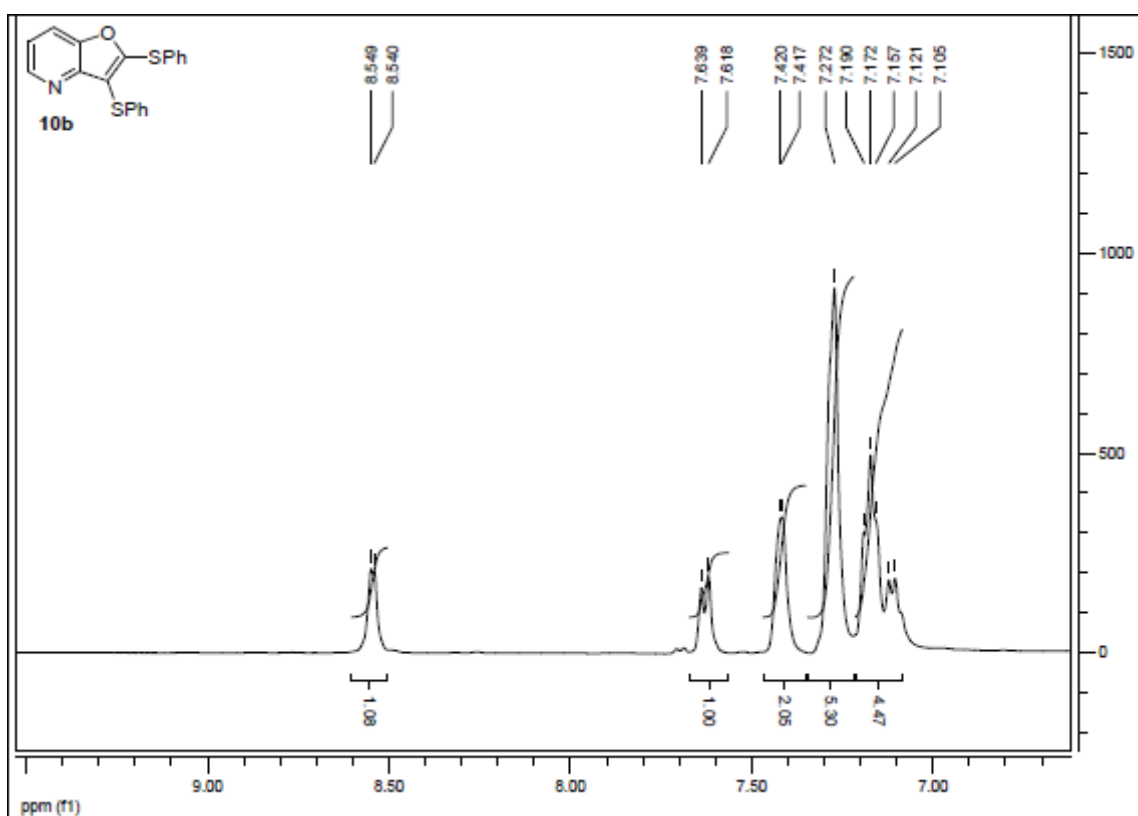

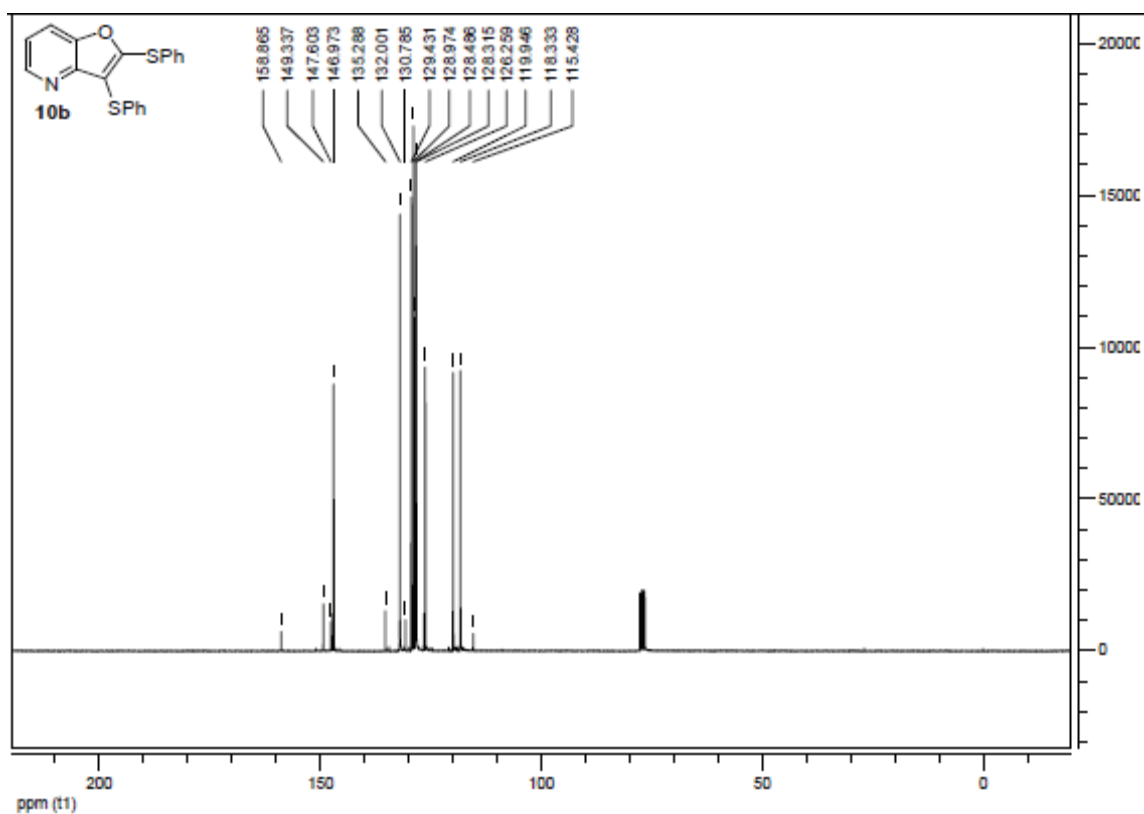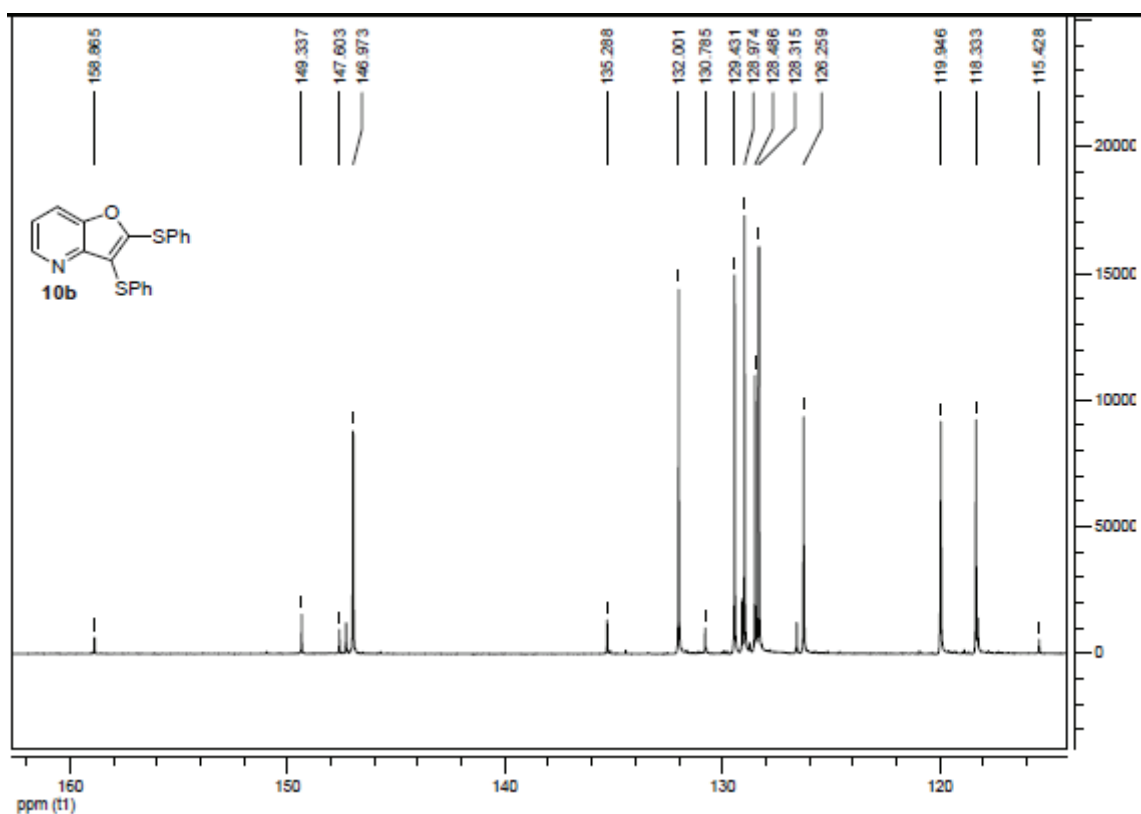

## GC, $^1\text{H}$ and $^{13}\text{C}$ for 11a.

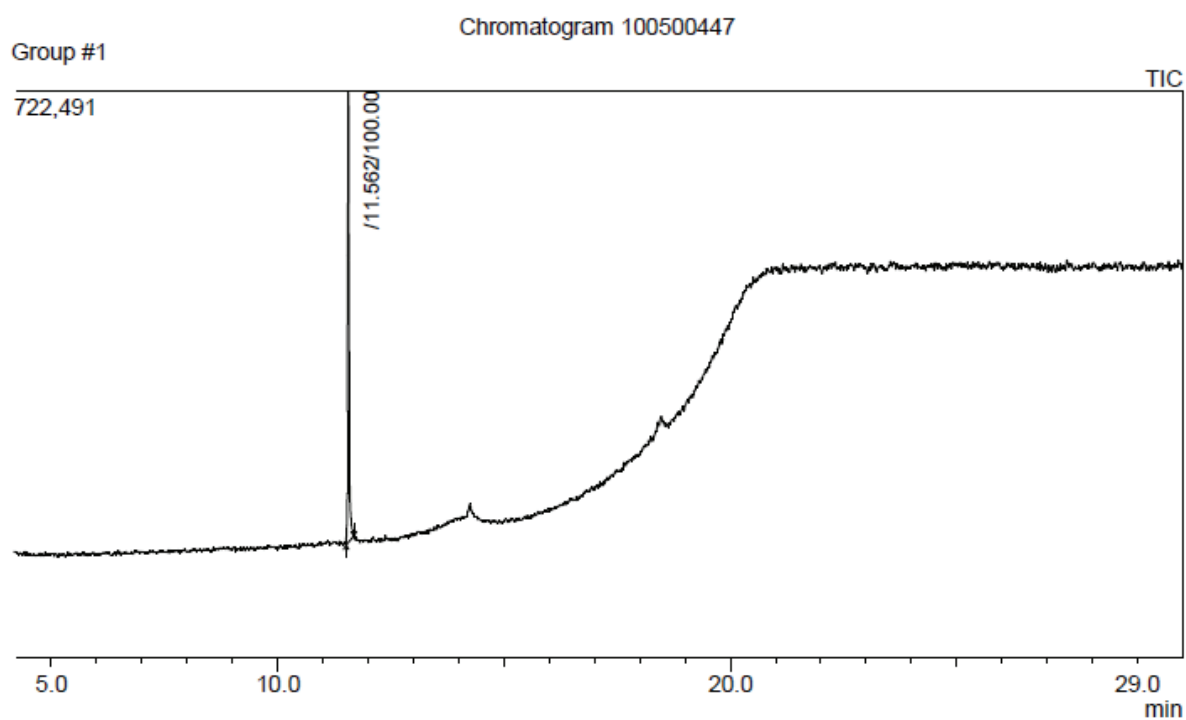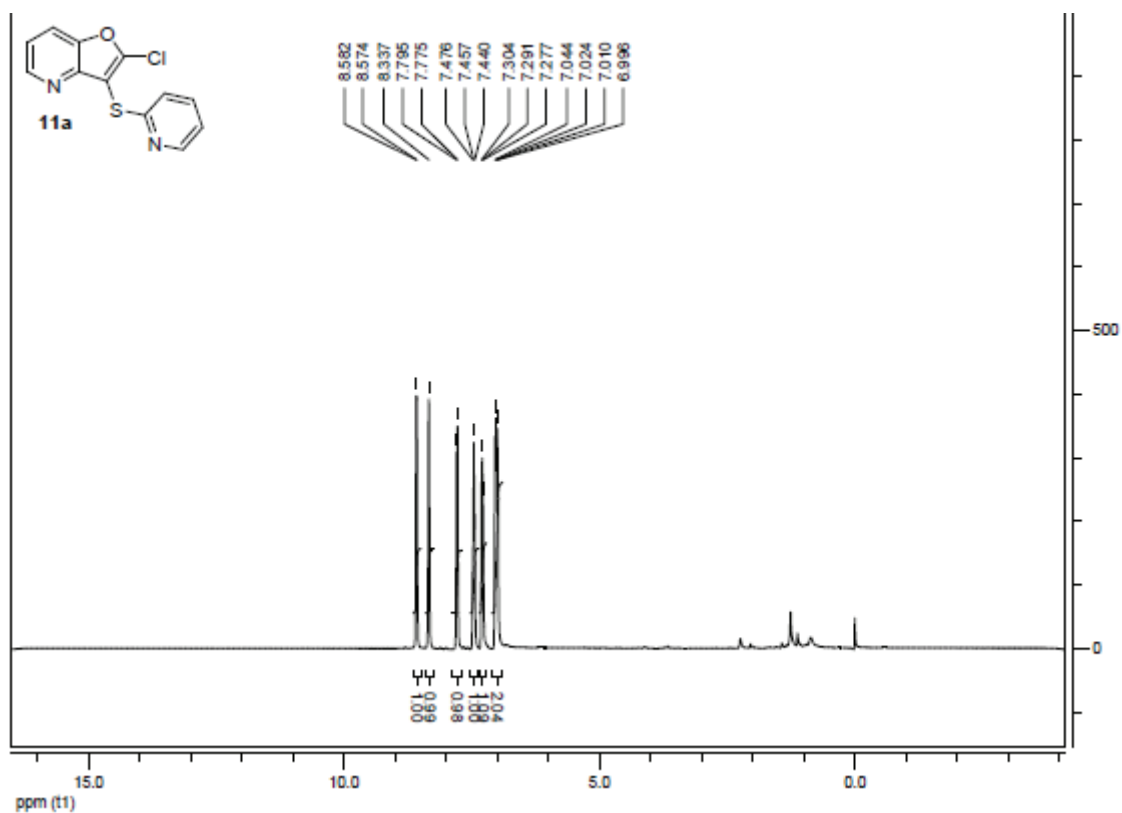

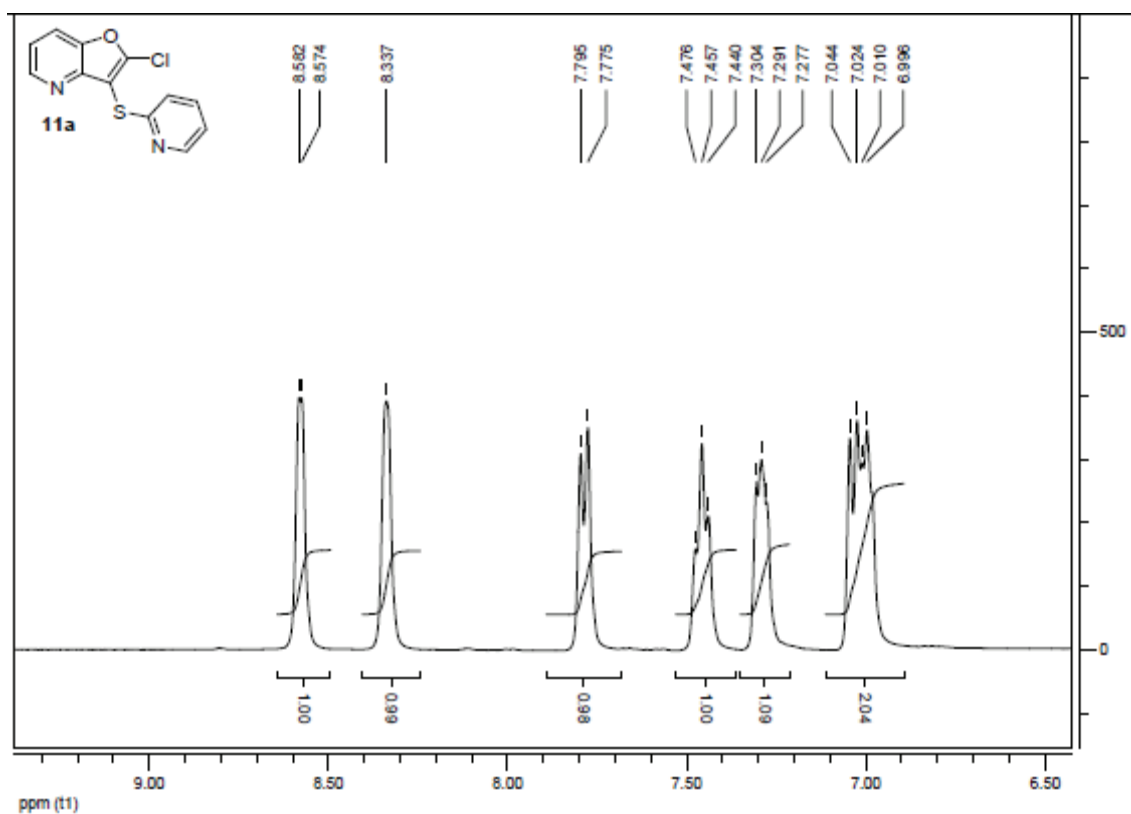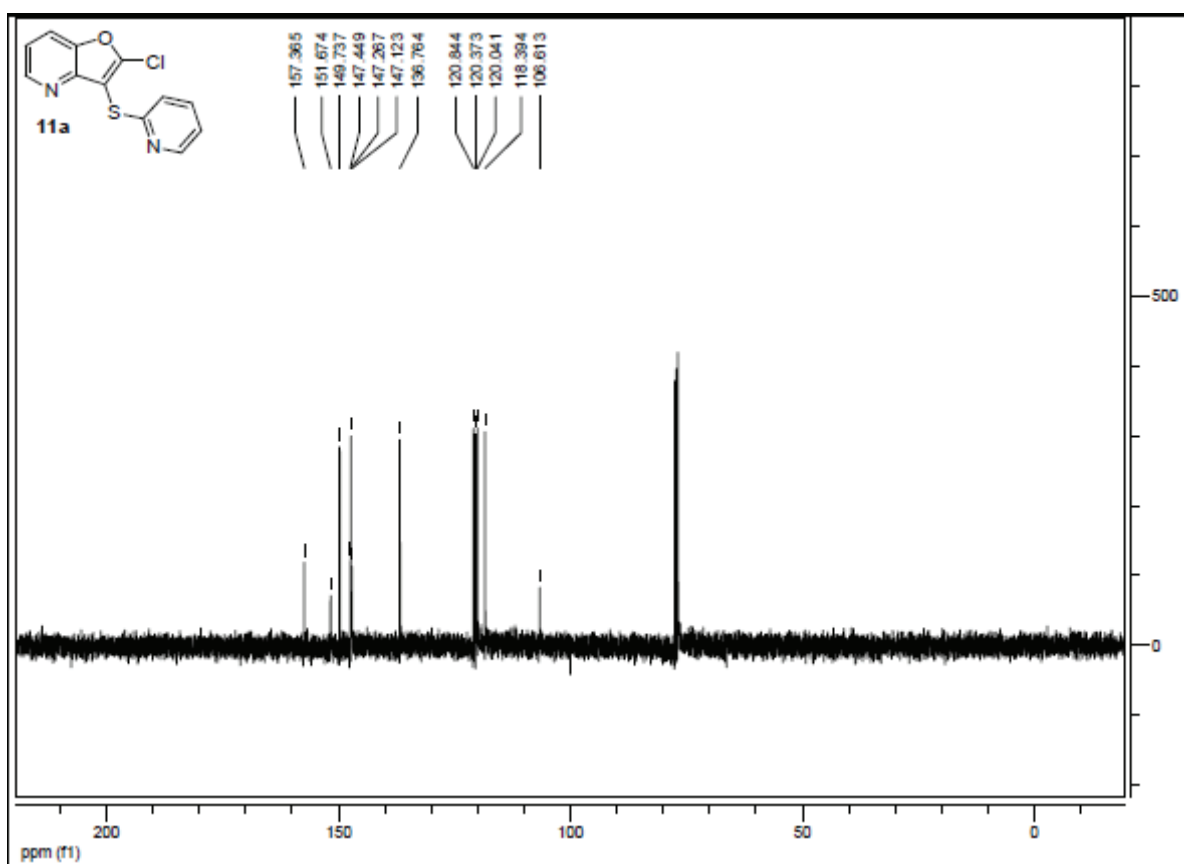

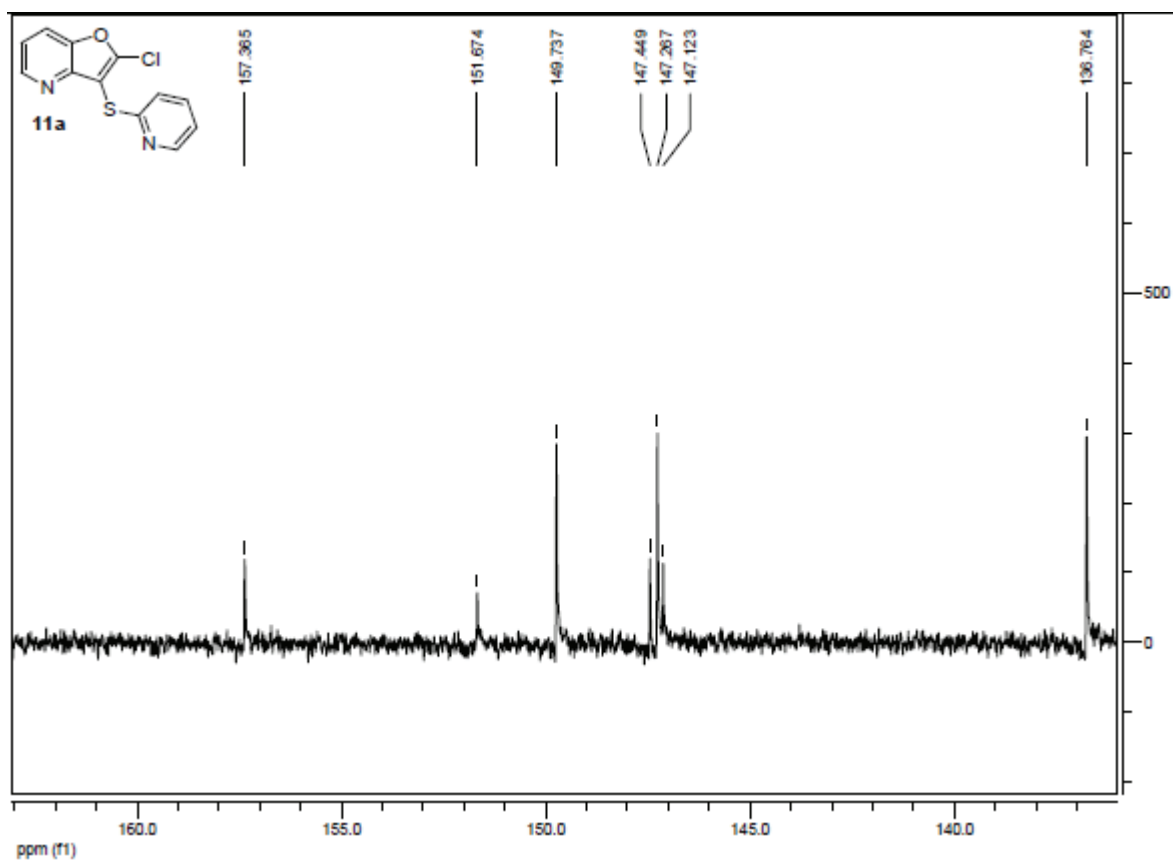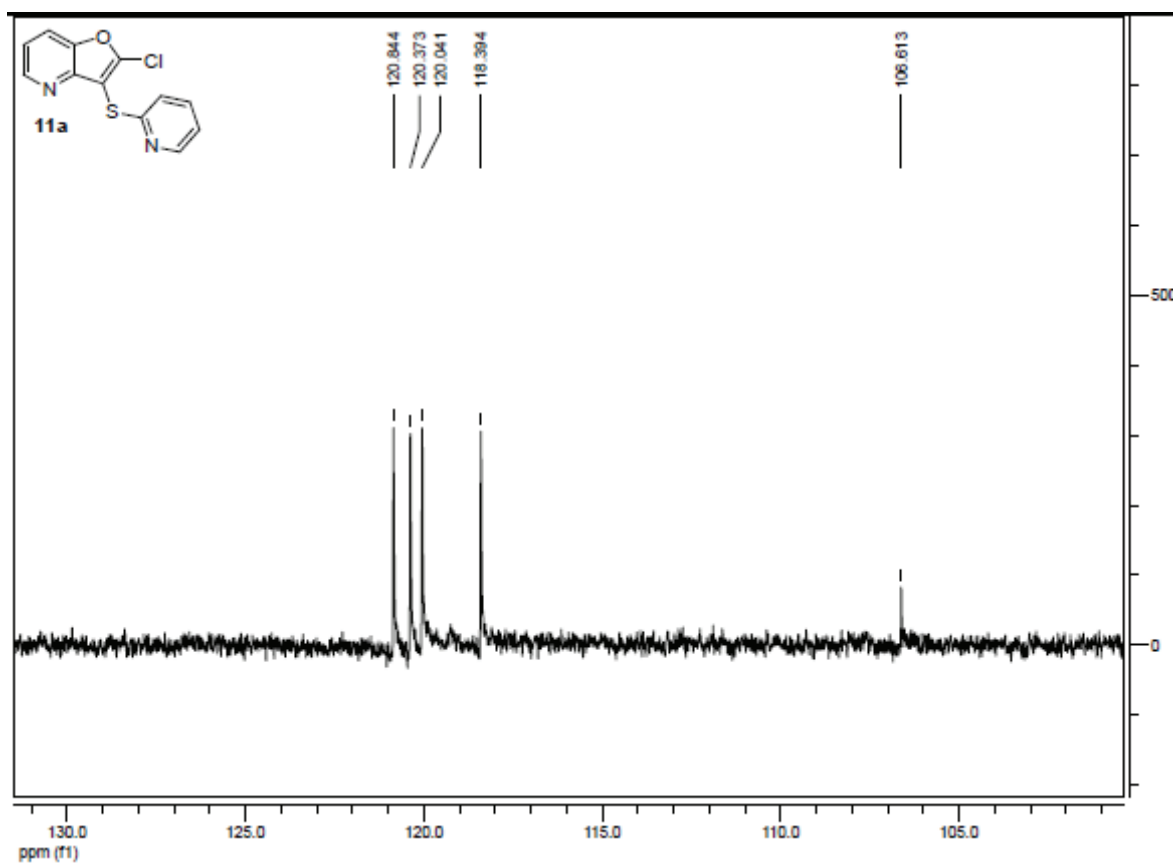





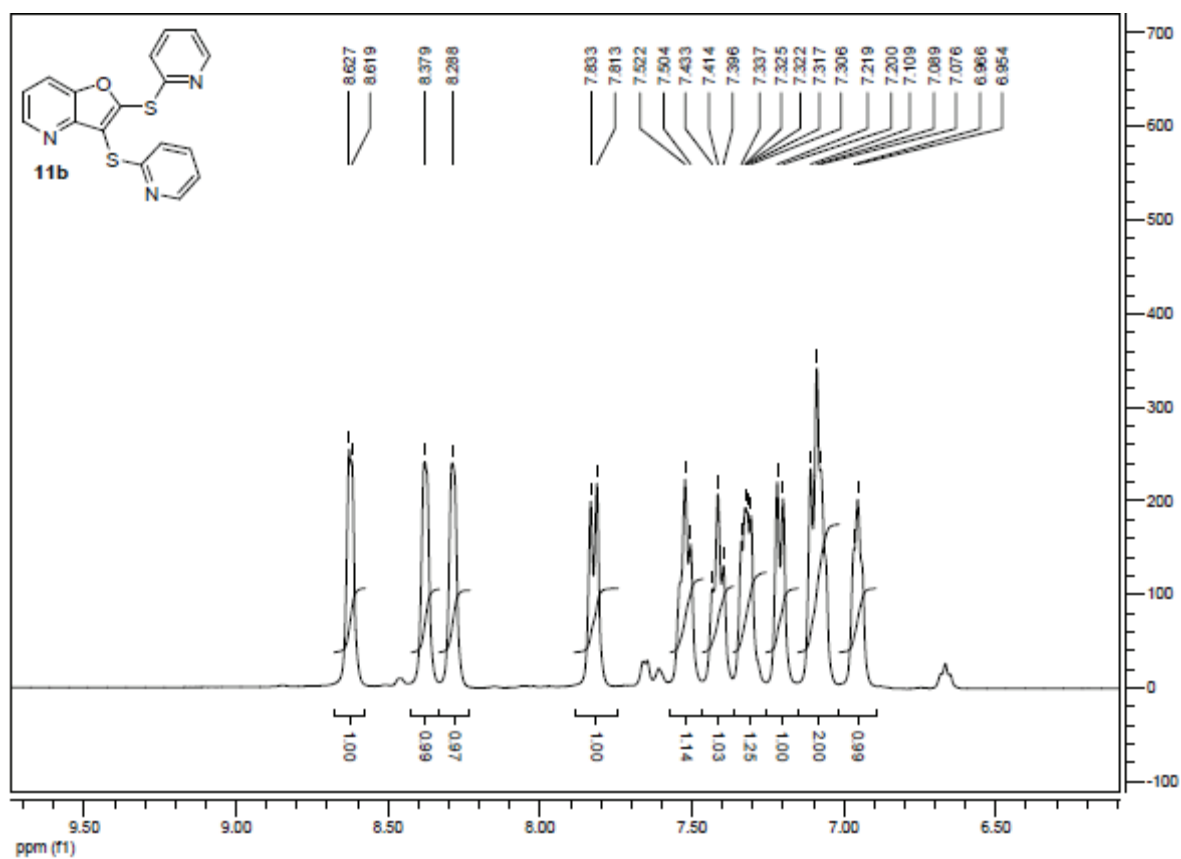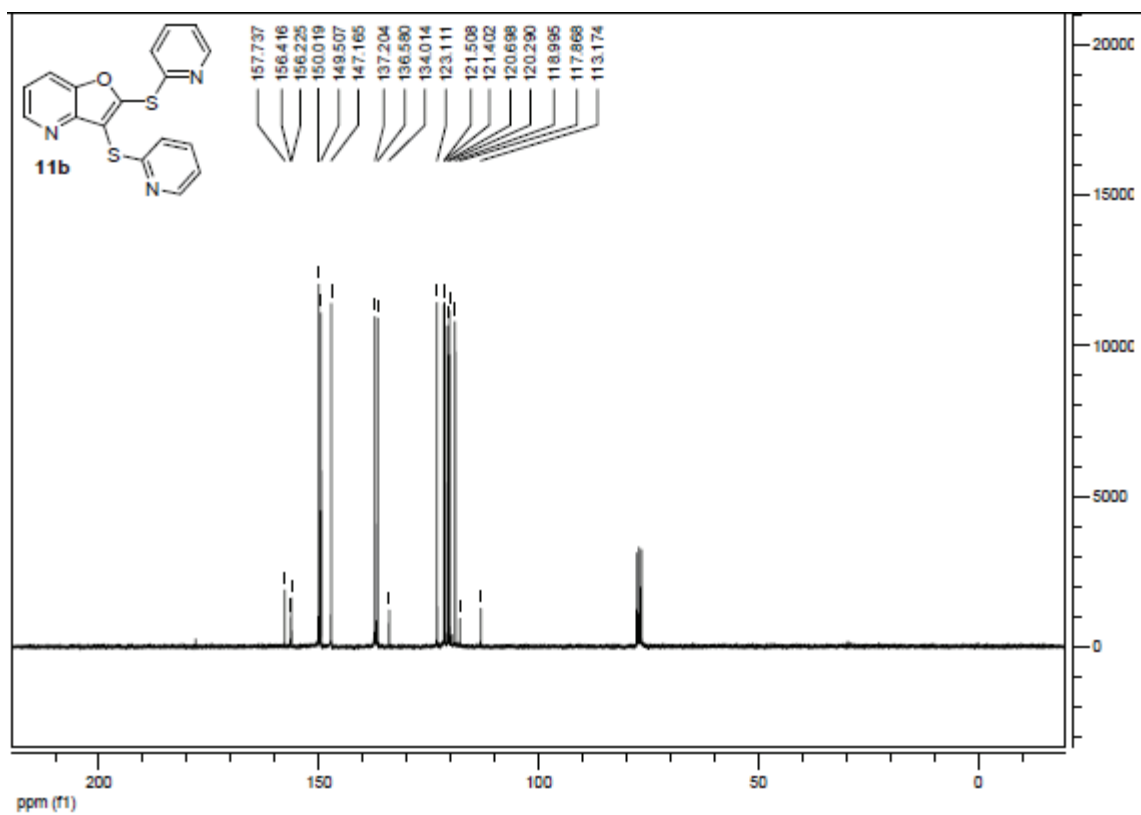

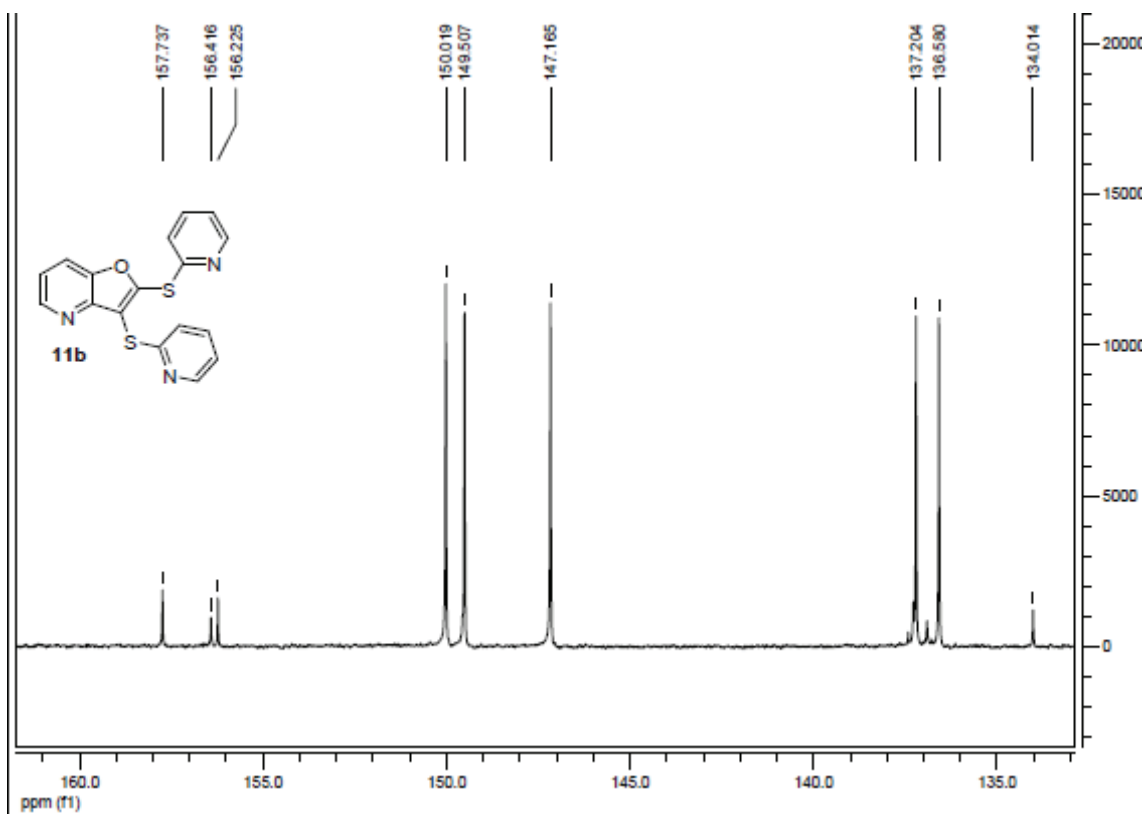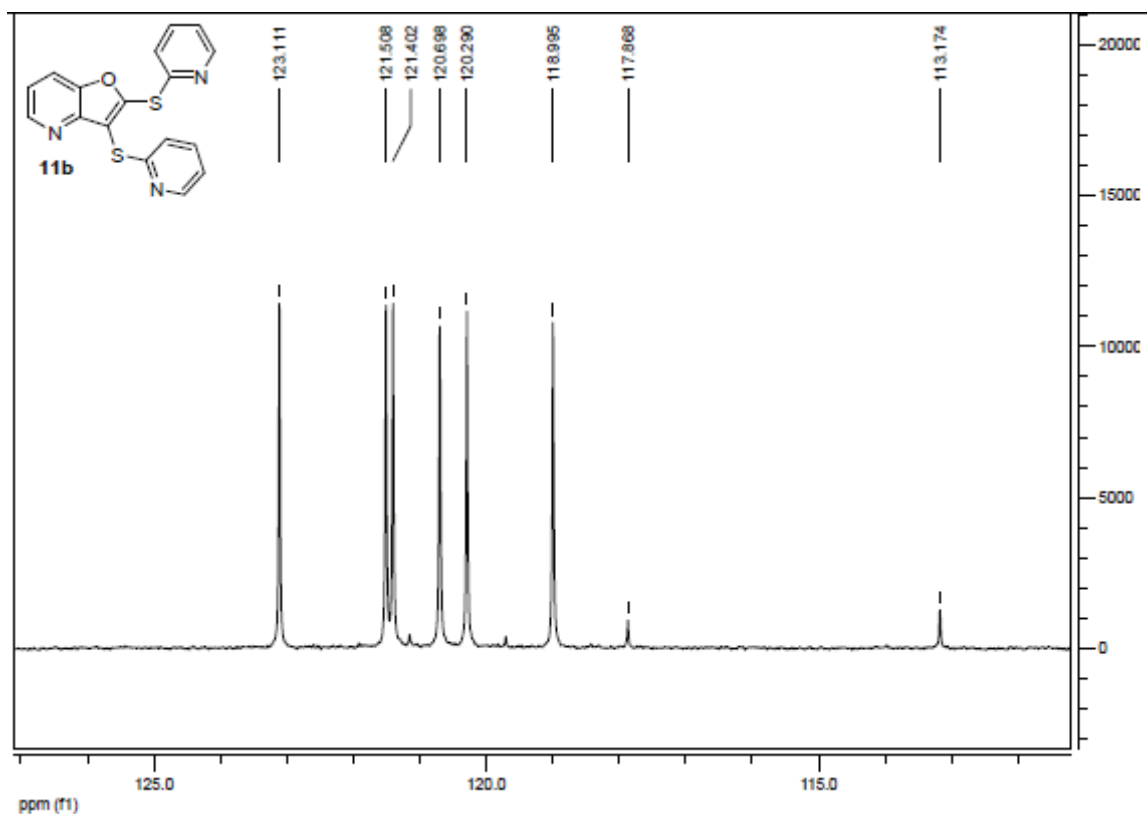

## GC, $^1\text{H}$ and $^{13}\text{C}$ for 12b.

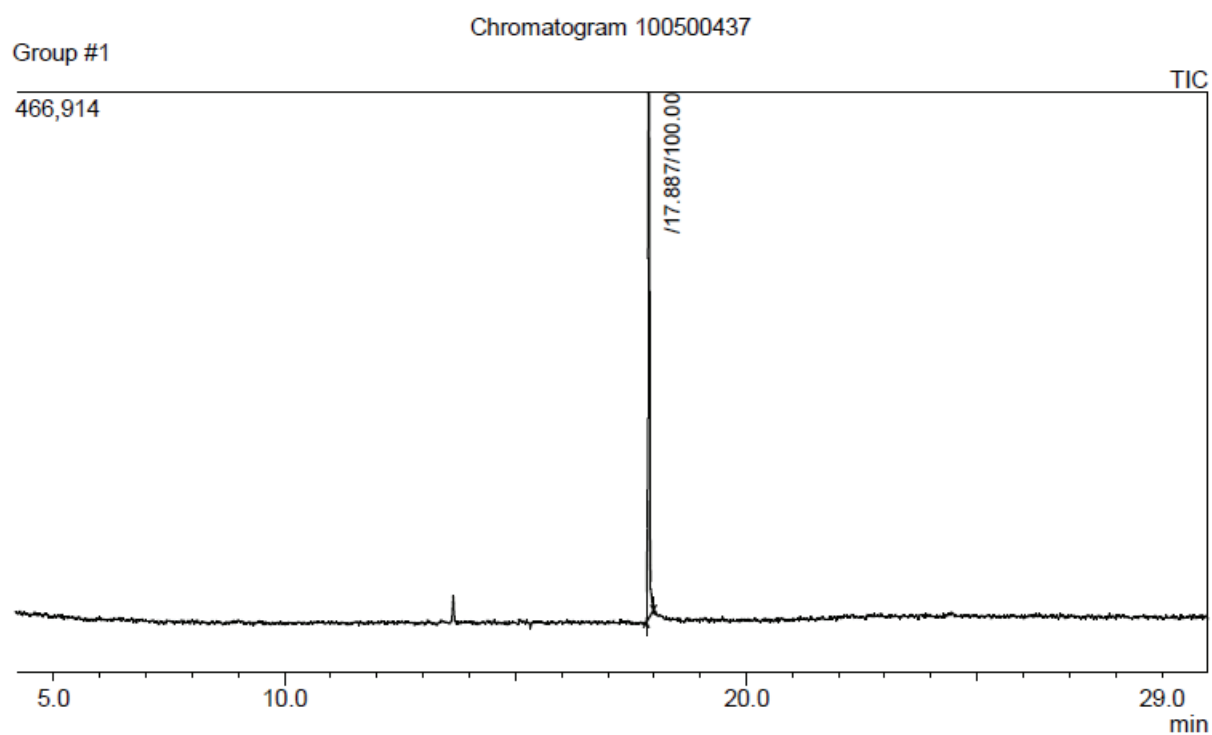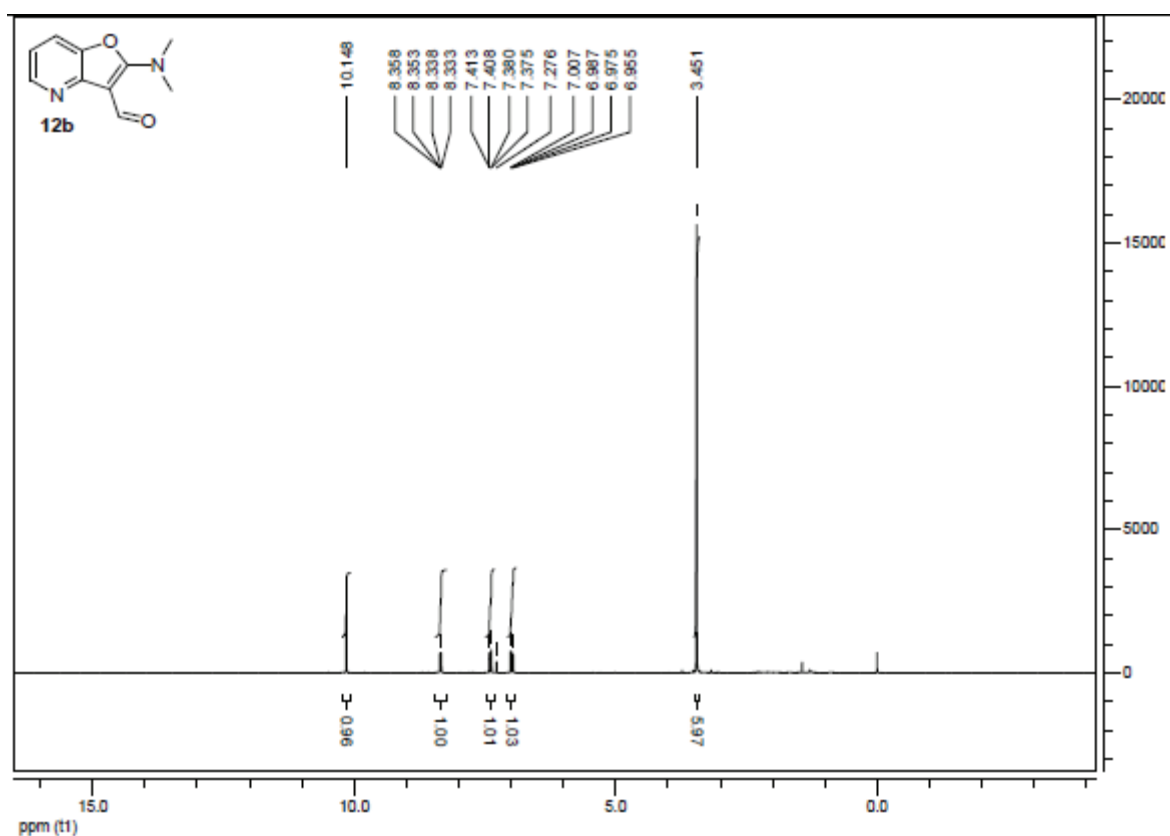

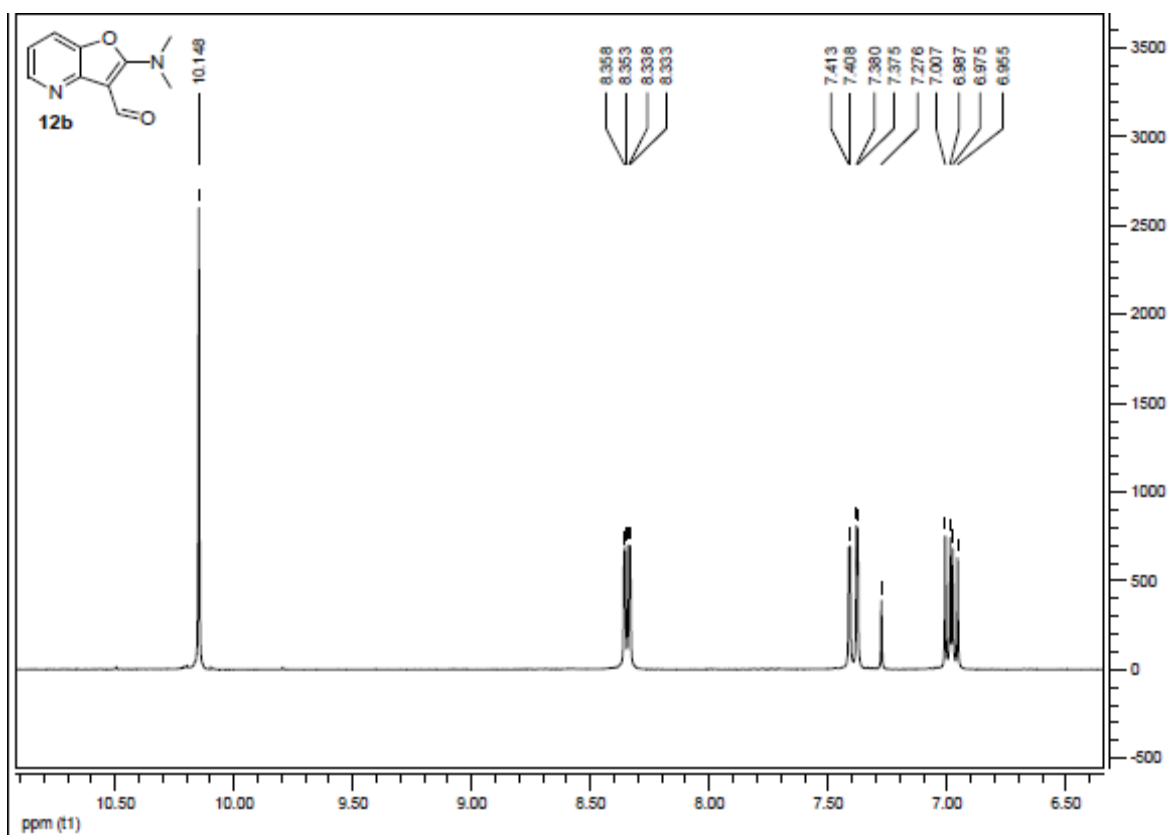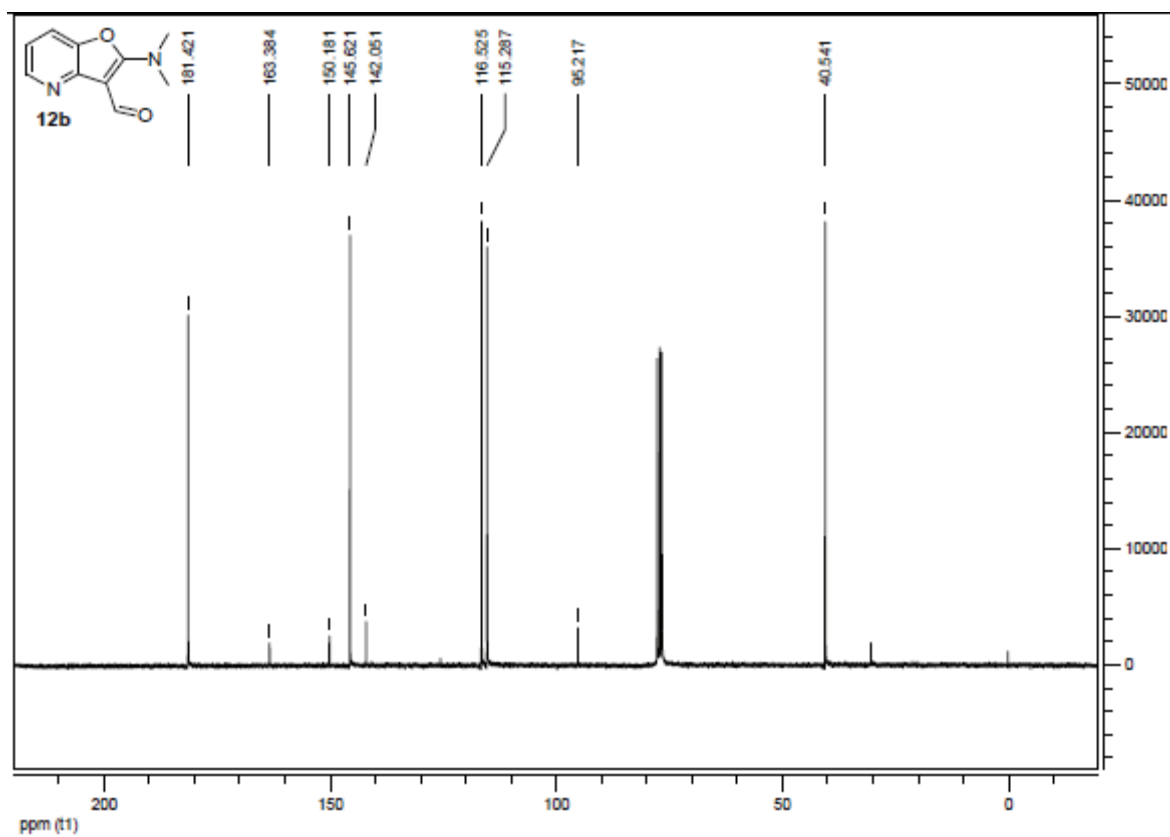

## GC, $^1\text{H}$ and $^{13}\text{C}$ for 13b.

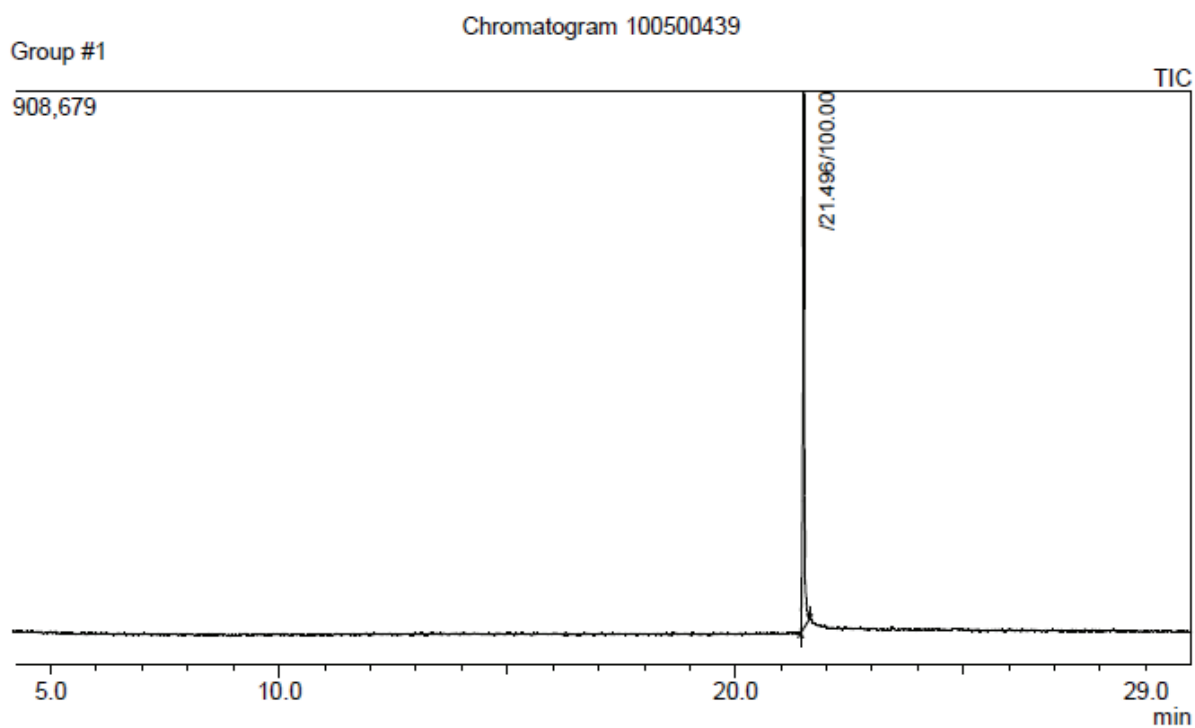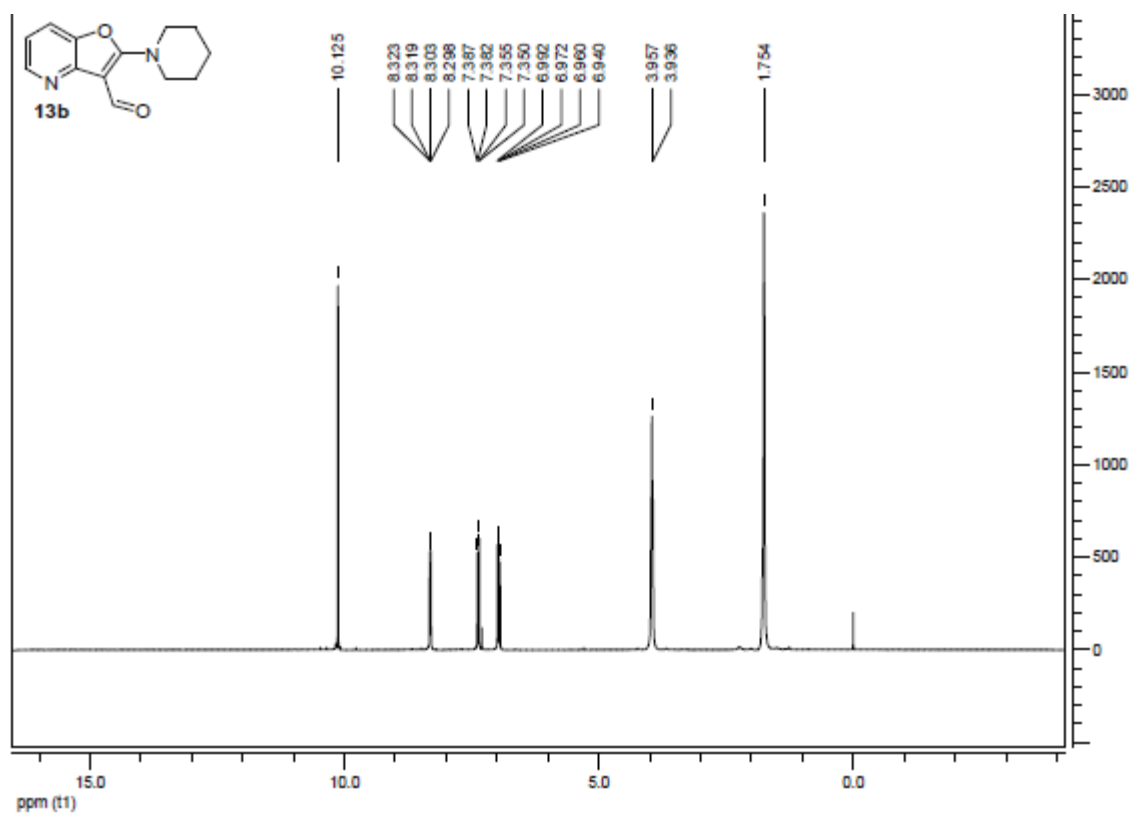

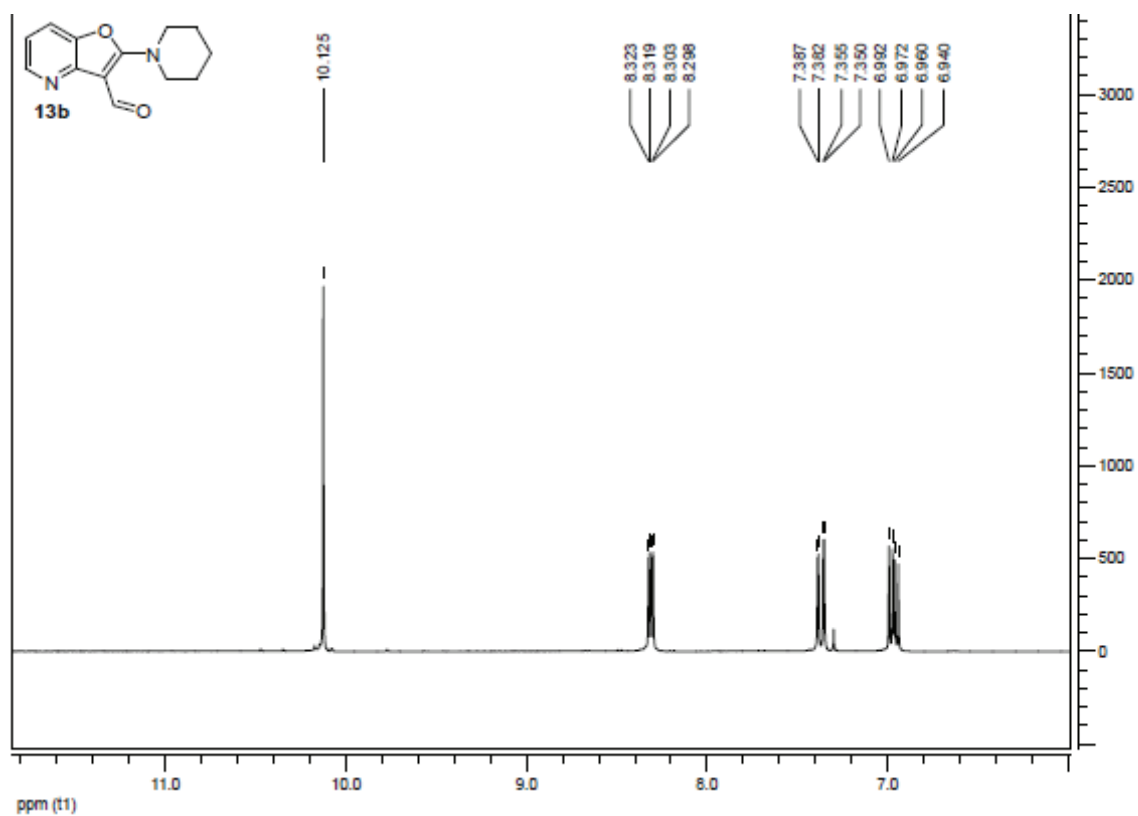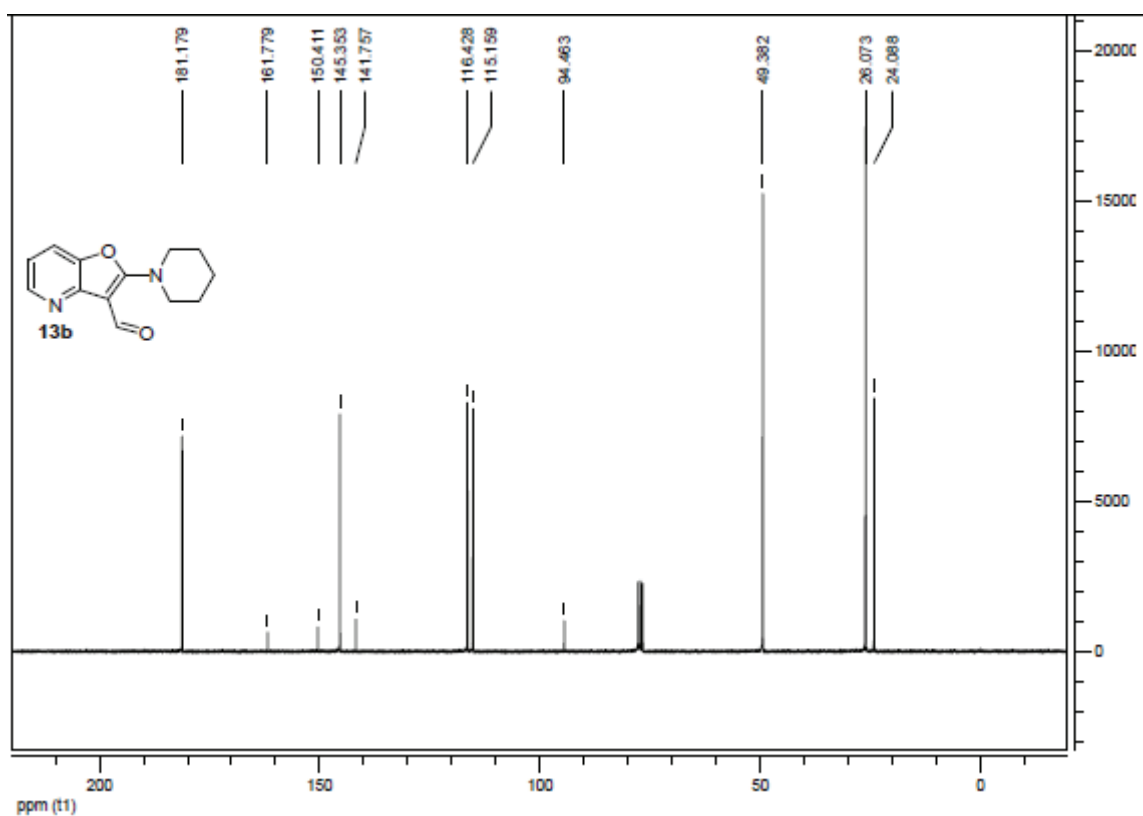

## GC, $^1\text{H}$ and $^{13}\text{C}$ for 14b.

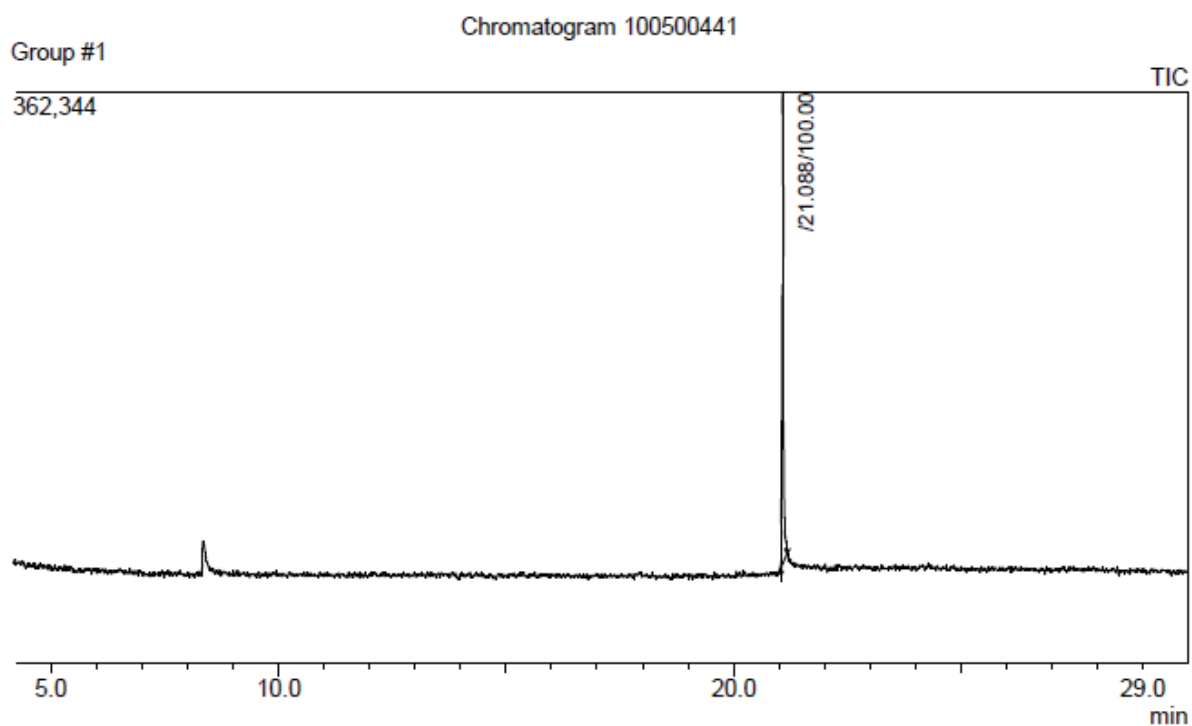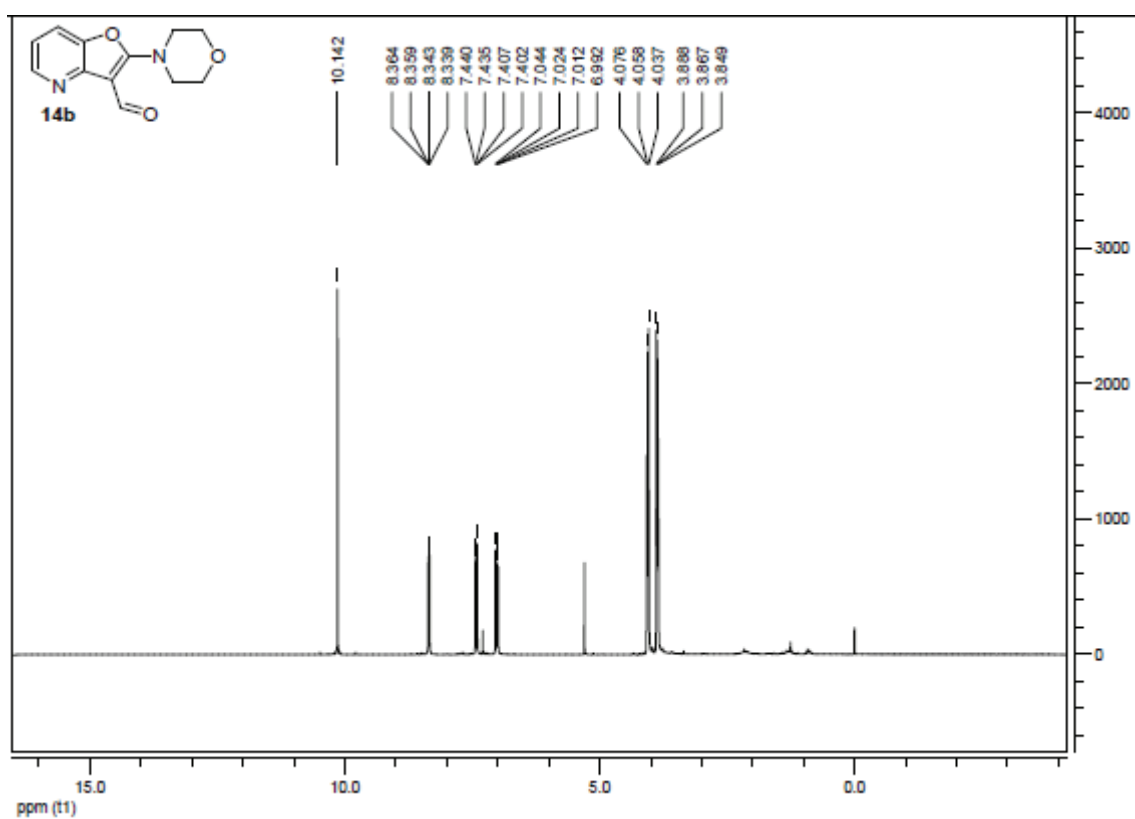



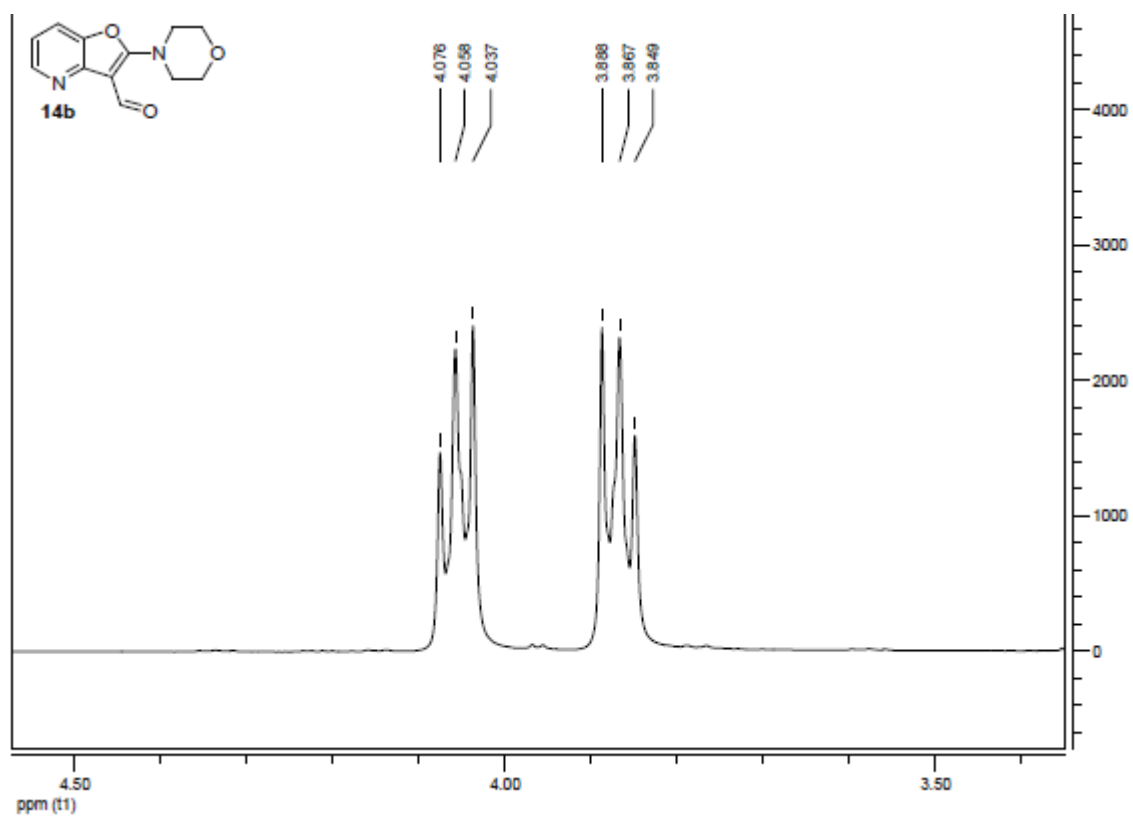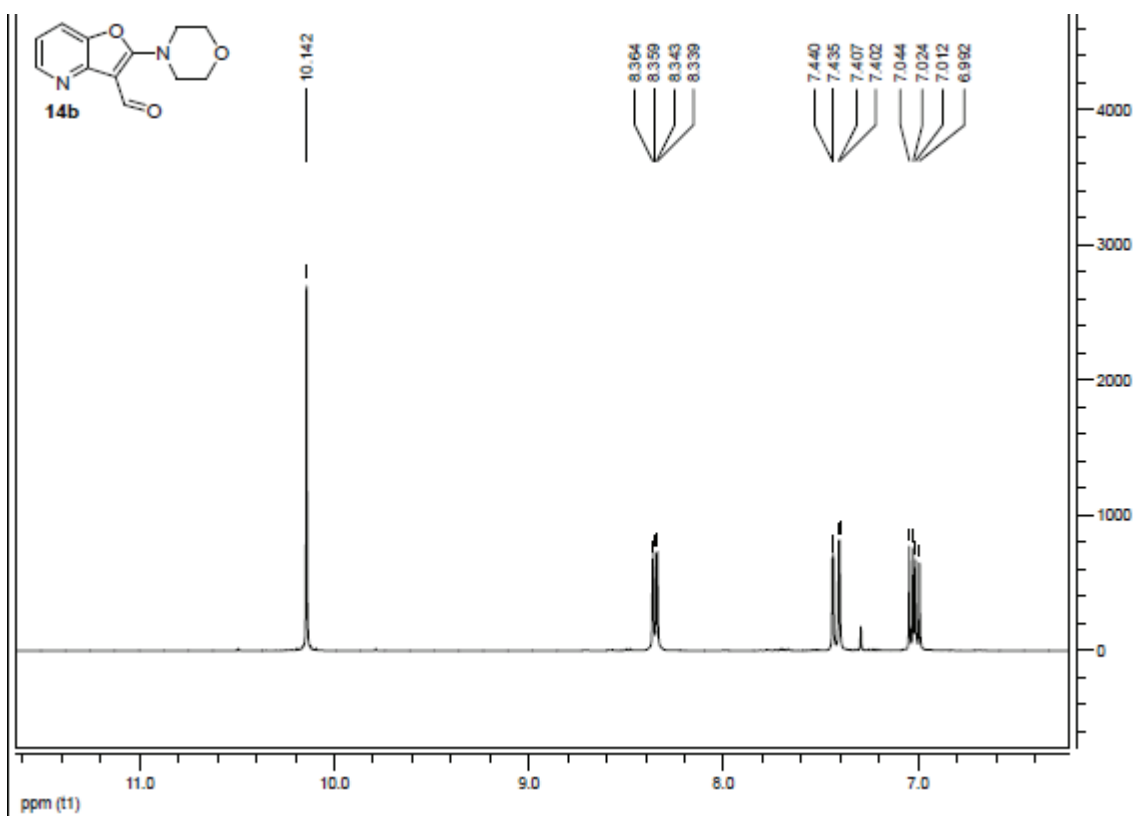

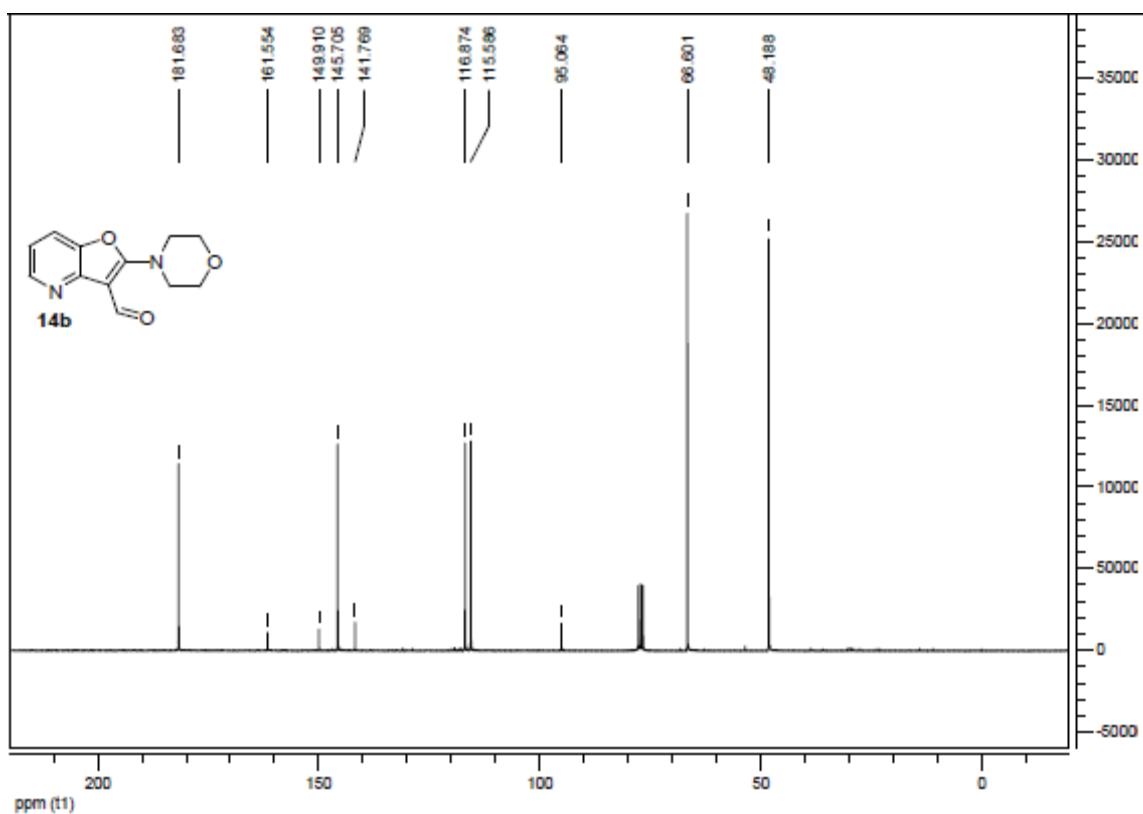

GC,  $^1\text{H}$  and  $^{13}\text{C}$  for **15b**.

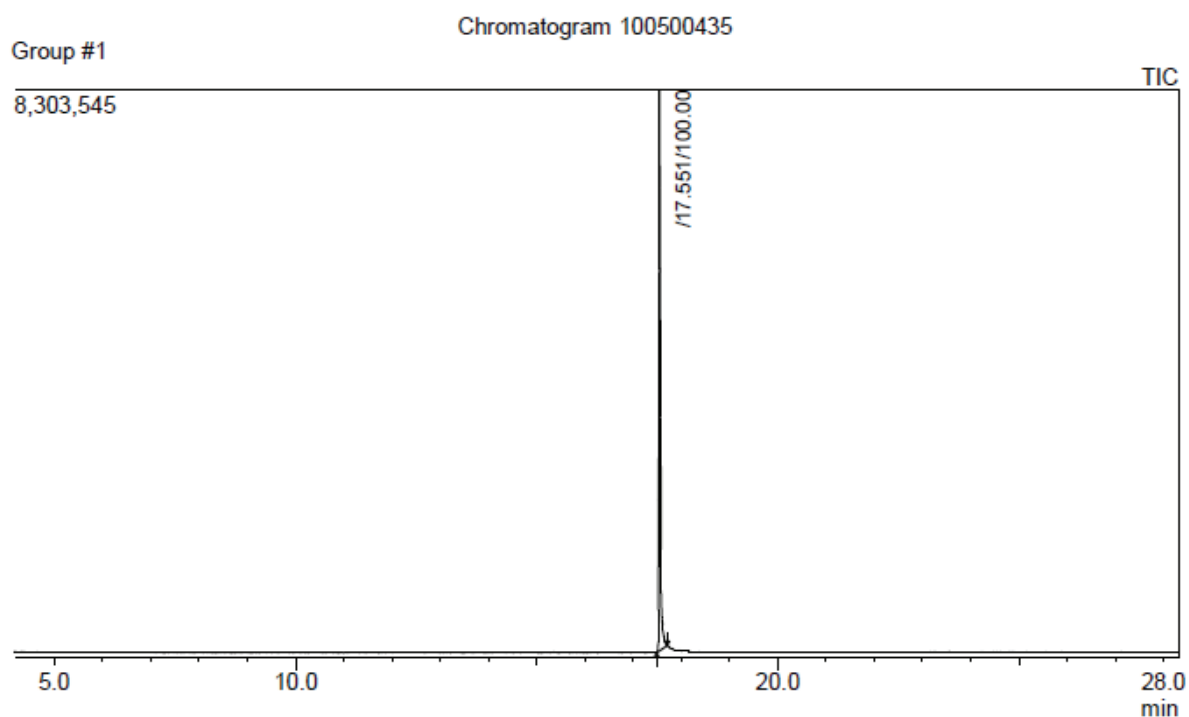

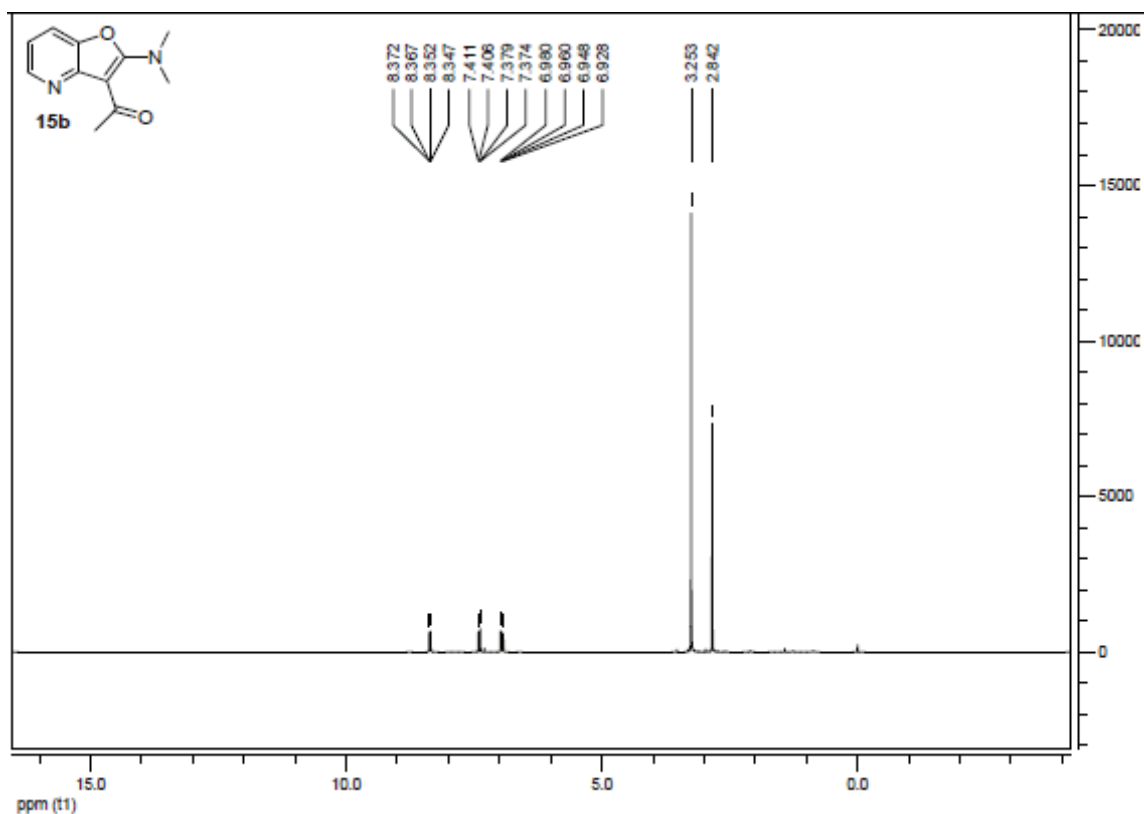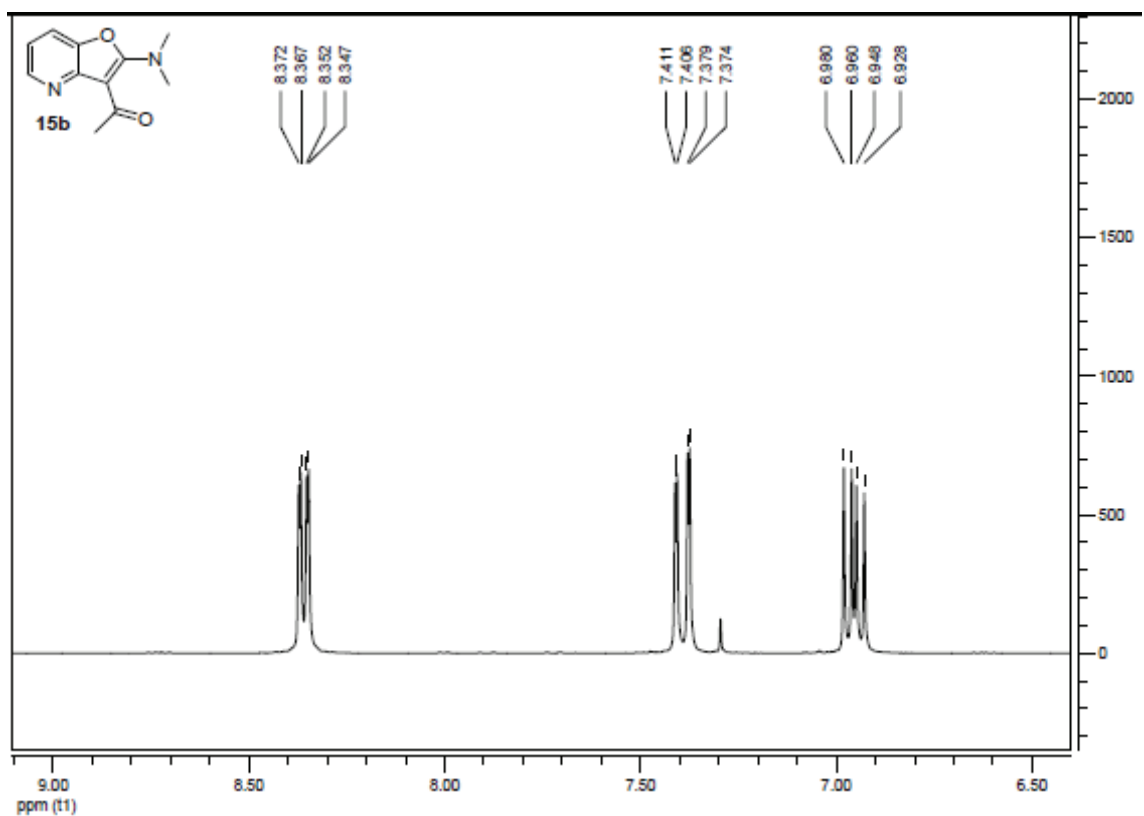

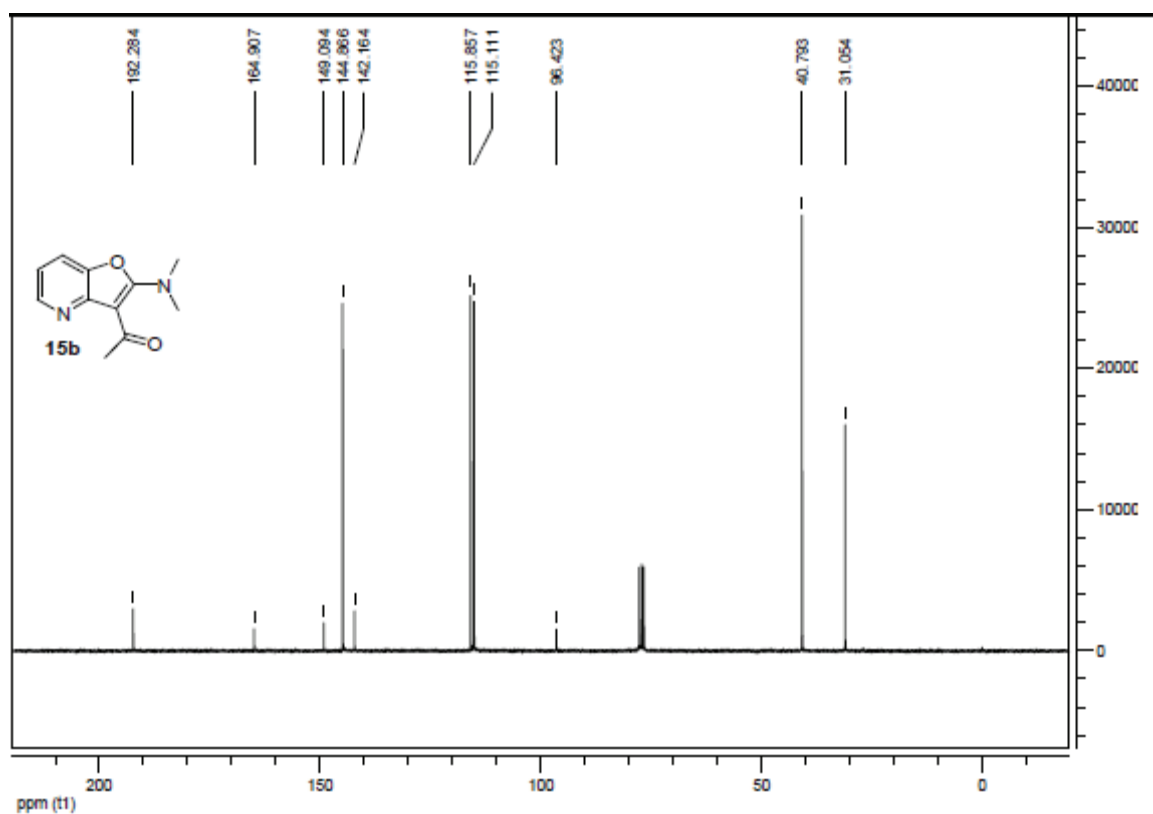

Supplement: c0ob00734j.pdf [file c0ob00734j.pdf]
